# Supplementary material for: The Children and Young People’s Health Partnership Evelina London Model of Care: process evaluation protocol
Source: PubMed Central journal article supplement — BMJ Open. 2019 Sep 3;9(8):e027302. doi: 10.1136/bmjopen-2018-027302 (PMC6731816; doi:10.1136/bmjopen-2018-027302), 2019-09-03
Supplement: bmjopen-2018-027302.draft_revisions.pdf [file bmjopen-2018-027302.draft_revisions.pdf]

# BMJ Open

BMJ Open is committed to open peer review. As part of this commitment we make the peer review history of every article we publish publicly available.

When an article is published we post the peer reviewers' comments and the authors' responses online. We also post the versions of the paper that were used during peer review. These are the versions that the peer review comments apply to.

The versions of the paper that follow are the versions that were submitted during the peer review process. They are not the versions of record or the final published versions. They should not be cited or distributed as the published version of this manuscript.

BMJ Open is an open access journal and the full, final, typeset and author-corrected version of record of the manuscript is available on our site with no access controls, subscription charges or pay-per-view fees (<http://bmjopen.bmj.com>).

If you have any questions on BMJ Open's open peer review process please email [info.bmjopen@bmj.com](mailto:info.bmjopen@bmj.com)

# BMJ Open

## The Children and Young People's Health Partnership Evelina London Model of Care: Process Evaluation Protocol

|                               |                                                                                                                                                                                                                                                                                                                                                                                                                                                                                                                                                                                                                        |
|-------------------------------|------------------------------------------------------------------------------------------------------------------------------------------------------------------------------------------------------------------------------------------------------------------------------------------------------------------------------------------------------------------------------------------------------------------------------------------------------------------------------------------------------------------------------------------------------------------------------------------------------------------------|
| Journal:                      | <i>BMJ Open</i>                                                                                                                                                                                                                                                                                                                                                                                                                                                                                                                                                                                                        |
| Manuscript ID                 | bmjopen-2018-027302                                                                                                                                                                                                                                                                                                                                                                                                                                                                                                                                                                                                    |
| Article Type:                 | Protocol                                                                                                                                                                                                                                                                                                                                                                                                                                                                                                                                                                                                               |
| Date Submitted by the Author: | 15-Oct-2018                                                                                                                                                                                                                                                                                                                                                                                                                                                                                                                                                                                                            |
| Complete List of Authors:     | Satherley, Rose-Marie; King's College London, Department of Population Health Sciences<br>Green, Judith; Kings College London, Department of Population Health Sciences<br>Sevdalis, Nick; King's College London,<br>Newham, James Joseph; King's College London , Department of Population Health Sciences<br>Elsherbiny , Mohamed; Kings College London, Department of Population Health Sciences<br>Forman, Julia; Kings College London , Department of Population Health Sciences<br>Wolfe, Ingrid; Kings College London, Department of Population Health Sciences<br>Lingam, Raghu; University of New South Wales |
| Keywords:                     | Child Health, Integrated Care, Process Evaluation                                                                                                                                                                                                                                                                                                                                                                                                                                                                                                                                                                      |
|                               |                                                                                                                                                                                                                                                                                                                                                                                                                                                                                                                                                                                                                        |

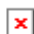

1  
2  
3 **TITLE: The Children and Young People's Health Partnership Evelina London Model of**  
4 **Care: Process Evaluation Protocol**  
5  
6  
7

8 **AUTHORS:** *Rose-Marie Satherley, Judith Green, Nick Sevdalis, James Newham, Mohamed*  
9 *Elsherbiny, Julia Forman, Ingrid Wolfe \*, Raghu Lingam \* (\*joint last), on behalf of the*  
10 *CYPHP team*  
11  
12

13  
14 **CORESPONDING AUTHOR:** Rose-Marie Satherley Department of Population Health  
15 Sciences, 6th Floor, Room 6.10, Addison House, Guy's Campus, London, SE1 1UL, rose-  
16 marie.satherley@kcl.ac.uk, 07766918732  
17  
18  
19  
20

21  
22 **FULL AUTHOR LIST:**  
23

24 Judith Green, Department of Population Health Sciences, Kings College London, London,  
25 UK London, UK  
26

27 Nick Sevdalis, Health Services and Population Research Department, Kings College  
28 London, London, UK London, UK  
29

30 James Newham, Department of Population Health Sciences, Kings College London,  
31 London, UK London, UK  
32

33 Mohamed Elsherbiny, Department of Population Health Sciences, Kings College London,  
34 London, UK London, UK  
35

36 Julia Forman, Department of Population Health Sciences, Kings College London, London,  
37 UK London, UK  
38

39 Ingrid Wolfe, Department of Population Health Sciences, Kings College London, London,  
40 UK London, UK  
41

42 Raghu Lingam, School of Women & Children's Health, University of New South Wales,  
43 Sydney, Australia  
44  
45

46  
47  
48  
49  
50  
51 **WORD COUNT: 3064**  
52  
53  
54  
55  
56  
57  
58  
59  
60

1  
2  
3  
4  
5  
6  
7  
8  
9  
10  
11  
12  
13  
14  
15  
16  
17  
18  
19  
20  
21  
22  
23  
24  
25  
26  
27  
28  
29  
30  
31  
32  
33  
34  
35  
36  
37  
38  
39  
40  
41  
42  
43  
44  
45  
46  
47  
48  
49  
50  
51  
52  
53  
54  
55  
56  
57  
58  
59  
60

For peer review only

1  
2  
3 **Introduction:** Children and young people (CYP) in the UK have poor health outcomes,  
4 and there is increasing emergency department and hospital outpatient use. To address  
5 these problems in Lambeth and Southwark, the local Clinical Commissioning Groups,  
6  
7 Local Authorities, and Healthcare Providers formed The Children and Young People's  
8  
9 Health Partnership (CYPHP), a clinical-academic programme for improving child health.  
10  
11 The Partnership has developed the CYPHP Evelina London model, an integrated  
12  
13 healthcare model that aims to deliver effective, coordinated care in primary and  
14  
15 community settings, and promote better self-management to over approximately  
16  
17 90,000 CYP in Lambeth and Southwark. This protocol is for the process evaluation of  
18  
19 this model of care.  
20

21  
22 **Methods and Analysis:** Alongside an impact evaluation, an in-depth, mixed-methods  
23  
24 process evaluation will be used to understand the barriers and facilitators to  
25  
26 implementing the model of care. The data collection will be mapped onto a logic model  
27  
28 of how CYPHP is expected to improve child health outcomes. Data collection and  
29  
30 analysis include qualitative interviews with stakeholders and a quantitative analysis of  
31  
32 routine clinical and administrative data, trial outcomes, and questionnaire data.  
33  
34 Information relating to the context of the trial that may affect implementation and/or  
35  
36 outcomes of the CYPHP model of care will be documented.  
37

38  
39 **Ethics and Dissemination:** The study has been reviewed by NHS REC Cornwall & Plymouth  
40  
41 (17/SW/0275). The findings of this process evaluation will guide the scaling up and  
42  
43 implementation of the CYPHP Evelina London Model of Care across the UK. Findings will  
44  
45 be disseminated through publications and conferences, and implementation manuals and  
46  
47 guidance for others working to improve child health through strengthening health  
48  
49 systems.  
50

51 **Trial Registration Number:** Clinicaltrials.gov Identifier: NCT03461848; Pre-results.  
52

### 53 54 55 **Strengths and Limitations of this Study** 56 57 58 59 60

- 1  
2  
3  
4  
5  
6  
7  
8  
9  
10  
11  
12  
13  
14  
15  
16  
17  
18  
19  
20  
21  
22  
23  
24  
25  
26  
27  
28  
29  
30  
31  
32  
33  
34  
35  
36  
37  
38  
39  
40  
41  
42  
43  
44  
45  
46  
47  
48  
49  
50  
51  
52  
53  
54  
55  
56  
57  
58  
59  
60
- This process evaluation will provide insights into how integrated care programmes can be implemented for children and young people at scale.
  - The evaluation using robust mixed quantitative and qualitative methods, is grounded within a theoretically informed logic model and uses the RE-AIM framework.
  - Stakeholders may be reluctant to discuss unwillingness to deliver intervention components, or negative perspectives of the model of care.
  - Triangulation of data sources will maximise credibility and validity.

1  
2  
3 The state of children's health is a growing concern across the United Kingdom, and  
4 health services and systems contribute to suboptimal outcomes.<sup>1,2</sup> In the context of  
5 increases in children and young people (CYP) living with long-term conditions (physical  
6 and psychosocial) and in multi-morbidity, current fractures within the system and  
7 healthcare delivery allow individuals to "fall through the gaps" in care.<sup>3,4</sup>  
8  
9  
10  
11  
12  
13

14 Current paediatric healthcare models were developed to deliver acute, inpatient, and  
15 high intensity specialist services rather than multidisciplinary, coordinated and planned  
16 care to prevent illness and disease complications and to maximize wellbeing and  
17 developmental potential.<sup>5</sup> To improve CYP's health, stronger health systems and more  
18 effective care models are needed, together with public health, social and economic  
19 policies to promote and protect health. Integrated care models may represent a solution  
20 to problems facing child health services.<sup>5</sup> The CYPHP Evelina London model of care is a  
21 new and integrated model of care for CYP that is part of a health systems strengthening  
22 programme.  
23  
24  
25  
26  
27  
28  
29  
30  
31

32 This paper describes the protocol for a mixed methods process evaluation embedded  
33 within a clustered randomised controlled trial to assess the impact of a complex  
34 intervention to integrate and improve healthcare, for CYP (the CYPHP Evelina London  
35 Model of Care). CYPHP will deliver services to over approximately 90,000 CYP in Lambeth  
36 and Southwark, two of the most deprived wards in the UK. This process evaluation aims  
37 to complement the clustered randomised controlled trial of outcomes,<sup>6</sup> to understand  
38 how the CYPHP Evelina London Model of Care achieved its outcomes, and to inform  
39 stakeholders about how and why the CYPHP Evelina Model of Care could be implemented  
40 in other settings.  
41  
42  
43  
44  
45  
46  
47  
48  
49  
50  
51

52 [The intervention: The Children and Young People's Health Partnership \(CYPHP\) Evelina](#)  
53 [London Model of Care](#)  
54  
55  
56  
57  
58  
59  
60

1  
2  
3 The CYPHP Evelina London Model of Care (in progress) is a complex intervention  
4 comprising several universal and targeted services for CYP (0-16 years). It is being  
5 implemented across two boroughs of inner South London, Lambeth and Southwark. The  
6 aim of the intervention is to improve child health by integrating and improving healthcare  
7 and strengthening the health system. The model aims to strengthen a comprehensive  
8 primary care service for CYP, and to integrate primary and secondary healthcare, physical  
9 and mental healthcare, healthcare with public health, improve the age appropriateness  
10 of care, and develop tailored care that is responsive to patients' needs. The model  
11 comprises two complementary approaches to services:  
12  
13  
14  
15  
16  
17  
18

- 19 1) A universal service available for all CYP resident in Lambeth and Southwark who  
20 access health care, and are registered with a Lambeth or Southwark GP;  
21  
22
- 23 2) Second, targeted services for CYP with one of three tracer conditions, asthma,  
24 eczema, or constipation. Tracer conditions were chosen with the intention of  
25 designing a generalizable model of care for CYP with common and chronic  
26 conditions as part of a health system response to the epidemiological transition  
27 to chronic disease.  
28  
29  
30  
31  
32  
33

34 The CYPHP model is the largest and most comprehensive evidence-based integrated care  
35 model for paediatric services currently being delivered and rigorously evaluated in the UK  
36 and will cover approximately 90,000 children.  
37  
38

39 There is a lack of comprehensive rigorous evidence about integrated models of care for  
40 CYP, the evaluation of the CYPHP Evelina London model of care will help fill this evidence  
41 gap by providing information on effectiveness and the process of implementing  
42 integrated models of care.  
43  
44  
45  
46  
47  
48

49 The implementation of the CYPHP Evelina London model of care across Lambeth and  
50 Southwark will occur in stages. This phased roll-out allowed the application of an  
51 opportunistic cluster Randomised Controlled Trial (cRCT) design, where for the first  
52 stage (approximately two years) GP practices are randomised to be offered either the  
53  
54  
55  
56  
57  
58  
59  
60



1  
2  
3 CYPHP model (i.e. delivery of targeted and universal services to eligible CYP) or  
4 enhanced usual care (EUC; i.e. delivery of universal services only to eligible CYP). Details  
5 of the evaluation design are presented in the accompanying protocol Paper (REF). In  
6  
7 summary, the evaluation has four component parts: 1) a pseudo-anonymised  
8  
9 population-based evaluation for all CYP in participating GP practices to explore changes  
10  
11 in health service use across control and intervention arms; 2) an evaluation of CYP with  
12  
13 one of 3 tracer conditions to understand changes in health and healthcare across  
14  
15 control and intervention arms; 3) an economic evaluation to assess the costs of delivery  
16  
17 and cost effectiveness of the CYPHP Evelina London Model of Care; and 4) a process  
18  
19 evaluation.  
20

21  
22  
23 The process evaluation, detailed in this paper, aims to provide in depth understanding  
24  
25 of the processes through which the intervention is delivered, and the mechanisms by  
26  
27 which any change occurs or not.<sup>7</sup> This detailed understanding will also help inform the  
28  
29 key components of delivery needed for successful scale-up of the intervention (if  
30  
31 successful) to other settings.  
32

### 33 34 The Process of Implementing a New Clinical Service 35

36  
37 The process evaluation will focus on measures of implementation success, including  
38  
39 reach, fidelity, adoption, and maintenance of the CYPHP Evelina London Model of Care.  
40  
41 Implementation science specifically looks at ways to enhance and promote the uptake of  
42  
43 research findings and evidence-based practices into routine healthcare; implementation  
44  
45 evaluation is therefore a key component of a comprehensive process evaluation for a  
46  
47 complex intervention evaluation.<sup>7,8</sup> Variation in implementation of the CYPHP Evelina  
48  
49 London model of care is inevitable, due to multiple intervention components, diverse  
50  
51 contexts and participants. Practices' differing characteristics influence their care  
52  
53 arrangements for CYP and will affect the roles and expectations of clinical and  
54  
55 administrative staff. Similarly, patients' previous experience and expectations of care  
56  
57 affects care-seeking behaviour. These differences, in the context of evolving local  
58  
59

1  
2  
3 healthcare environments, policies, and priorities may affect the successful  
4 implementation of the new model of care.<sup>9</sup>  
5  
6

7  
8 Process evaluations need to be designed, delivered, and analysed within a theoretical  
9 framework to allow clearer articulation of research questions, validated instruments to  
10 assess outcomes and theory-driven explanations for success or failure of implementation  
11 efforts. This is essential to understand the mechanisms which underlie the programme's  
12 effectiveness and to application in other populations and settings. Glasgow's RE-AIM  
13 Framework<sup>10</sup> proposes five domains that can influence the implementation of new  
14 services. The framework's five domains guide the assessment of:  
15  
16  
17  
18  
19

- 20  
21 1. **Reach**, which captures the percentage of people from a given population who  
22 participate in a program and describes their characteristics  
23
- 24 2. **Effectiveness**, which refers to the positive and negative outcomes of the  
25 program  
26  
27
- 28 3. **Adoption**, which is generally defined as the per cent of possible settings (*e.g.*,  
29 organizations) and staff that have agreed to participate in the program  
30  
31
- 32 4. **Implementation**, which is an indicator of the extent to which the program was  
33 delivered as intended and its cost  
34  
35
- 36 5. **Maintenance**, which, at the individual level, reflects maintenance of the primary  
37 outcomes (>6 months)  
38  
39

40 The RE-AIM Framework has been applied to understand intervention impact across a  
41 variety of healthcare settings and acknowledges the value of qualitative data to  
42 complement quantitative measures.<sup>11</sup> The core aspects of the RE-AIM Framework will be  
43 incorporated into our process evaluation and used to understand the interpretation of  
44 qualitative findings.  
45  
46  
47  
48

49 In tandem, we are also utilising elements of Normalisation Process Theory (NPT)<sup>12</sup> in the  
50 analysis to enhance understanding of whether and how the model is integrated into  
51 routine practice. NPT focuses on the implementation of new practices and how these new  
52 practices become embedded and sustained in their social contexts. NPT consists of four  
53  
54  
55  
56  
57  
58  
59  
60

1  
2  
3 constructs: (1) Coherence – the understanding of the new set of practices; (2) Cognitive  
4 Participation – who completes the work required by the new set of practices; (3)  
5 Collective Action – how the work that is required by the new set of practices is done; and  
6  
7 (4) Reflexive Monitoring – how the work required by the new set of practices is  
8 understood.  
9

### 10 11 12 13 Aim

14  
15 The overall aim of the CYPHP process evaluation is to better understand how and why the  
16 CYPHP Evelina London model of care was effective or ineffective; to identify contextually  
17 relevant strategies for successful implementation; and to identify practical difficulties and  
18 facilitators in adoption, delivery, and maintenance to inform wider implementation. The  
19 overarching questions guiding the evaluation for the CYPHP Evelina London model of care  
20 are:  
21  
22

- 23 (1) What factors contribute to the effectiveness (or ineffectiveness) of the CYPHP  
24 Evelina London model of care?
- 25 (2) What factors contribute to successful or challenging implementation across  
26 study sites?  
27  
28  
29  
30  
31  
32

### 33 34 Methods

#### 35 36 Patient and Public Involvement

37  
38 The CYPHP Evelina London model was developed with key stakeholders including  
39 CYP, carers, front line practitioners and health service commissioners. Stakeholders  
40 were involved in the development of the theoretical framework for CYPHP,  
41 identification of research questions and refining the research methodology.  
42  
43

#### 44 45 Theoretical framework for CYPHP

46  
47 To facilitate the operationalisation of the programme, and the measurement and  
48 analysis of the implementation and outcomes of the CYPHP Evelina London model of  
49 care, the components of the programme have been conceptualised as a theoretical  
50 framework (or logic model). This theoretical framework for CYPHP is depicted in Figure 1  
51 and described in detail in our accompanying paper.<sup>6</sup> The theoretical framework has  
52  
53  
54  
55  
56  
57  
58  
59  
60

1  
2  
3 been guided by the WHO health systems building blocks concept<sup>13</sup> and was developed  
4 using workshop methods with the CYPHP programme team and wider stakeholders. The  
5 CYPHP Evelina London Model of Care has been developed in a dynamic commissioning  
6 landscape, so may evolve throughout the trial period. Any evolutions will be  
7 documented as part of this process analysis.  
8  
9  
10  
11  
12  
13  
14  
15  
16  
17  
18  
19  
20  
21  
22  
23  
24  
25  
26  
27  
28  
29  
30  
31  
32  
33  
34  
35  
36  
37  
38  
39  
40  
41  
42  
43  
44  
45  
46  
47  
48  
49  
50  
51  
52  
53  
54  
55  
56  
57  
58  
59  
60

### Setting/Target Groups for Process Evaluation

The intervention components of the CYPHP Evelina London Model of Care are situated in primary care settings and the community. These interventions target service providers (GP receptionists, practice nurses, primary care providers, school nurses), CYP and families. Commissioners of healthcare services in Lambeth and Southwark are not directly targeted by the intervention components, but as influential participants, they are included in the process evaluation.

### Data Collection

The process evaluation will use a mixed methods approach to data collection and analysis. We will use the following methods of data collection: **1)** surveys of all stakeholders; **2)** analysis of routine clinical and administrative data; **3)** interviews and/or focus groups with stakeholders; and **4)** a review of policy documents during the planning and delivery of the CYPHP Evelina Model of Care. Data collection will be guided by the RE-AIM framework and NPT. The process indicators as per the RE-AIM framework are mapped into the logic model and presented in Table 1.

## 1) Surveys of all Stakeholders

Service providers and commissioners participating in the intervention arms of the CYPHP Evelina Model of Care will be invited to complete the Normalisation Process Theory tool (NoMAD).<sup>14</sup> Surveys will be distributed across service provider and commissioner channels across Lambeth and Southwark (e.g. GP events, mailing lists, and locality meetings), after implementation of the full CYPHP Evelina London Model of Care. The NoMAD is a 23-item instrument used to assess the implementation process, using constructs that form Normalization Process Theory. In addition, routinely collected service satisfaction data from CYP and family surveys will be audited to assess satisfaction with the CYPHP services.

The quantitative data collected from the NoMAD tool and service satisfaction questionnaires will be analysed using descriptive statistics. NoMAD scores will be used as an indicator of engagement to inform recruitment of service providers and commissioner participants to the qualitative component of the process evaluation.

## 2) Routine Clinical and Administrative Data

Routinely collected data will be used to assess the proportion of service users and service providers who participate in each part of the CYPHP Evelina model of care (outlined in Figure 1). Outcomes of service users who receive any element of the CYPHP Evelina London Model of Care and description of any relevant adverse clinical events will be documented (as detailed in Table One).

GP practices from both trial arms will be profiled for size, organisational characteristics, GP characteristics (e.g. number and whole time equivalent of GP partners and salaried staff, years qualified, proportion who have additional paediatric qualifications or special interests in child health), and the number of patients registered with the practice. This will facilitate assessment of practice context and effects of contextual variation. The quantitative data collected from all practices will be analysed using descriptive statistics to provide information about the differential implementation

1  
2  
3 rates of the intervention components. This will be related to trial outcomes and will  
4 facilitate comparison of practices regarding implementation fidelity and reach.  
5  
6

### 7 8 **3) Interviews and/or Focus Groups with all Stakeholders** 9

10 Qualitative data will be collected through interviews and focus groups with  
11 commissioners, service providers, CYP and families who have participated in any  
12 component in the intervention arm of the CYPHP Evelina Model of Care. CYP and families  
13 will be invited to take part in a focus group within two weeks of receiving an intervention  
14 component. Sampling will be purposive rather than statistical, to include CYP and families  
15 from diverse settings with a wide range of circumstances that may influence  
16 responsiveness and accessibility to healthcare. Children under 12 years will only  
17 participate alongside their carer.  
18  
19

20 Topic guides aim to elucidate narrative data on: the experience of CYPHP interventions,  
21 healthcare use, self-management and perspectives on care. A range of appropriate art-  
22 based methods (e.g. pipe cleaners, drawing, puppets) will be used to engage younger  
23 children in the discussions.<sup>15</sup> A facilitator, who is experienced in working with CYP and  
24 families, will guide discussions, which will be audio-recorded.  
25

26 Service providers involved in the delivery of the CYPHP Evelina London model of care  
27 will be invited to take part in one-to-one interviews. Sampling across the intervention  
28 clusters will result in sufficient heterogeneity to provide examples of relatively poor  
29 and good adoption, delivery and maintenance, and will allow us to identify barriers and  
30 facilitators to implementation and to generate hypotheses about factors that may be  
31 associated with differing outcomes. Topic guides were written using the RE-AIM  
32 Framework and will explore common issues when working with the CYPHP Evelina  
33 London Model of Care, the perceived effectiveness of the model, the use and  
34 understanding of the model of care, and changes in practice attributed to the model of  
35 care.  
36  
37  
38  
39  
40  
41  
42  
43  
44  
45  
46  
47  
48  
49  
50  
51  
52  
53  
54  
55  
56  
57  
58  
59  
60

1  
2  
3 Topic guides for interviews and focus groups with commissioners of healthcare services  
4 in Lambeth and Southwark are designed to elicit perceptions on the motivation for  
5 commissioning child health service programmes including the CYPHP Evelina London  
6 Model of Care, the ambitions for the model of care, and the facilitators and barriers to  
7 commissioning healthcare services within Lambeth and Southwark. These guides consider  
8 the key components of Normalisation Process Theory (i.e. Coherence, Cognitive  
9 Participation, Collective Action, Reflexive Monitoring) to allow an in-depth exploration of  
10 the implementation process.  
11  
12  
13  
14  
15  
16  
17

18  
19 Analysis of qualitative data will be largely inductive, drawing on the principles of  
20 thematic analysis, but informed by Normalisation Process Theory and the RE-AIM  
21 Framework.<sup>16,17</sup> Inductive themes will emerge through repeated examination and  
22 comparison; tabulation; and mapping. In reports, they will be illustrated with  
23 anonymised verbatim quotes from participants.  
24  
25  
26  
27  
28

#### 29 **4) Review of Policy Documents**

30  
31  
32 Information relating to the context of the trial that may affect the implementation  
33 and/or outcomes of the CYPHP Evelina London model of care will be documented. In  
34 addition, a review of policy documents over the duration of the CYPHP trial will take  
35 place. Information will be reviewed, and relevant information extracted into a timeline.  
36  
37 The timeline will be available to consult when results from other sources (both  
38 quantitative and qualitative) begin to emerge, to understand patterns appearing in  
39 those data over time and between health centres and catchment areas.  
40  
41  
42  
43  
44  
45

#### 46 **Triangulation of Data Sources**

47  
48  
49 Credibility and validity will be maximised through cross verification and exploration of  
50 differences between the outcomes of the various methods. This takes place in four ways:  
51  
52  
53  
54  
55  
56  
57  
58  
59  
60



- 1
  - 2
  - 3
  - 4
  - 5
  - 6
  - 7
  - 8
  - 9
  - 10
  - 11
  - 12
  - 13
  - 14
  - 15
  - 16
  - 17
  - 18
  - 19
  - 20
  - 21
  - 22
  - 23
  - 24
  - 25
  - 26
  - 27
  - 28
  - 29
  - 30
  - 31
  - 32
  - 33
  - 34
  - 35
  - 36
  - 37
  - 38
  - 39
  - 40
  - 41
  - 42
  - 43
  - 44
  - 45
  - 46
  - 47
  - 48
  - 49
  - 50
  - 51
  - 52
  - 53
  - 54
  - 55
  - 56
  - 57
  - 58
  - 59
  - 60
1. Maximising validity in analysis of qualitative data within the research team by techniques such as discussing coding, constant comparison, accounting for deviant cases, systematic coding.
  2. Triangulation of interviews with results from the NoMAD questionnaire, exploring and accounting for differences.
  3. Mapping the perspectives of commissioners, service managers, healthcare providers, CYP and caregivers to give a complete view of stakeholder perspectives.
  4. Conducting multiple focus groups sampled from service user, managers and commissioners in different GP clusters

### Ethics and Dissemination

This process evaluation has been reviewed by NHS REC Cornwall & Plymouth (17/SW/0275). The study has been registered with Clinicaltrials.gov (Identifier: NCT03461848; Pre-results). The results of the study will be disseminated via presentations at local, national and international conferences, peer-reviewed journals and workshops with all stakeholders. The findings of this process evaluation will be crucial for scaling up implementation both within and outside of the boroughs of Lambeth and Southwark, London.

### Discussion

Current paediatric healthcare models were developed to deliver acute inpatient and high intensity specialist services rather than high quality care for children with long-term conditions who need multidisciplinary, coordinated and planned care to prevent illness and disease complications and to maximize wellbeing and developmental potential.<sup>18</sup> As a result, integrated care models have been proposed as a solution to improve child health services worldwide.<sup>5</sup> Integrated care models have the potential to make an important contribution towards improving child health.<sup>19</sup> Although this hypothesis is plausible and is the basis of a great deal of policy, evidence is still indirect and limited. Therefore, a

1  
2  
3 thorough evaluation of the processes through which such integrated care programmes  
4 for children and young people are implemented is timely and important.  
5  
6  
7

8 While we have made every effort to ensure the rigour of the process evaluation, the  
9 assessment of fidelity largely relies on self-report through service provider interviews  
10 and/or questionnaires. Service providers may be reluctant to talk about unwillingness to  
11 deliver intervention components or may not have the skills or be comfortable to rate their  
12 own competence. Piloting interview guides has enabled us to improve these procedures  
13 to reduce the risk of social desirability bias. Our purposive sampling methods will collect  
14 data from an array of participants and ensure data collection will continue until  
15 saturation. This process evaluation will provide insights into how integrated care can be  
16 implemented for children and young people. We anticipate that this process evaluation  
17 will allow us to provide a comprehensive understanding of how outcomes were achieved  
18 by the program and how to implement programmes and integrated care models of this  
19 nature in alternative settings.  
20  
21  
22  
23  
24  
25  
26  
27  
28  
29  
30  
31

32 **Authors' contributions:** RS was responsible for writing the first draft of the protocol. RS,  
33 JG, NS, JN, ME, JF, RL and IW were involved in the study design and in obtaining ethical  
34 approvals. RL and IW were responsible for study conception. All authors commented on  
35 the manuscript and agreed with the final version.  
36  
37  
38  
39  
40  
41

42 **Funding statement:** This work was supported by Guys and St Thomas Charity, grant  
43 number HIF180101KCL.  
44  
45

46 **Competing interests' statement:** No authors have any conflicts of interest to declare.  
47  
48  
49  
50  
51  
52  
53  
54  
55  
56  
57  
58  
59  
60

## References

1. Wolfe I, Mandeville K, Harrison K, et al. Child survival in England: Strengthening governance for health. *Health Policy* 2017; **121**(11): 1131-1138.  
<https://doi:10.1016/j.healthpol.2017.09.004>
2. Viner RM. *State of Child Health: Report*. London: Royal College of Paediatrics & Child Health, 2017.
3. Wolfe I, Cass H, Thompson M J, et al. Improving child health services in the UK: insights from Europe and their implications for the NHS reforms. *British Medical Journal* 2011; **342**: 1277. <https://doi: 10.1136/bmj.d1277>
4. Were WM, Daelmans B, Bhutta Z, et al. Children's health priorities and interventions. *British Medical Journal* 2015; **351**: h4300.  
<https://doi.org/10.1136/bmj.h4300>
5. Wolfe I, Thompson M, Gill P, et al. Health services for children in western Europe. *Lancet (London, England)* 2013; **381**(9873): 1224–1234.  
[https://doi.org/10.1016/S0140-6736\(12\)62085-6](https://doi.org/10.1016/S0140-6736(12)62085-6).
6. Newham JJ, Forman JR, Heys M, et al. The Children and Young People's Health Partnership (CYPHP) Evelina London Model of Care: Protocol for an opportunistic cluster randomised evaluation (cRCT) to assess child health outcomes, healthcare quality and health service use. *Submitted to BMJ Open, 2018*.
7. Moore GF, Audrey S, Barker M, et al. Process evaluation of complex interventions: Medical Research Council guidance. *British Medical Journal* 2015; **350**: h1258. <https://doi.org/10.1136/bmj.h1258>
8. Oakley A, Strange V, Bonell C, et al. Process evaluation in randomised controlled trials of complex interventions. *British Medical Journal* 2006; **332**(7538): 413–416. <https://doi.org/10.1136/bmj.332.7538.413>
9. Linnan L, Steckler A. Process evaluation for public health interventions and research: an overview. In: Linnan L, Steckler A, editors. *Process Evaluation for Public Health Interventions and Research*. San Francisco, CA: Jossey-Bass; 2002. pp. 2–24.

10. Glasgow RE, Vogt TM, Boles SM. Evaluating the public health impact of health promotion interventions: the RE-AIM framework. *American Journal of Public Health* 1999; **89**(9): 1322–1327.
11. Kessler RS, Purcell EP, Glasgow RE, et al. What does it mean to “employ” the RE-AIM model? *Evaluation & the Health Professions* 2013; **36**(1): 44–66.  
<https://doi.org/10.1177/0163278712446066>
12. May CR, Mair F, Finch T, et al. Development of a theory of implementation and integration: Normalization Process Theory. *Implementation Science* 2009; **4**: 29.  
<https://doi.org/10.1186/1748-5908-4-29>
13. World Health Organisation (2010). *Monitoring the building blocks of health systems: A handbook of indicators and their measurement strategies*. Geneva, Switzerland.
14. Finch CF, White P, Twomey D, et al. Implementing an exercise-training programme to prevent lower-limb injuries: considerations for the development of a randomised controlled trial intervention delivery plan. *British Journal of Sports Medicine* 2011; *bjsports*81406.  
<https://doi.org/10.1136/bjism.2010.081406>
15. Coad J. Using art-based techniques in engaging children and young people in health care consultations and/or research. *Journal of Research in Nursing* 2007; **12**(5): 487–497.
16. Braun V, Clarke V. Using thematic analysis in psychology. *Qualitative Research in Psychology* 2006; **3**(2): 77–101. <https://doi.org/10.1191/1478088706qp063oa>
17. Murray E, Treweek S, Pope C. et al. Normalisation process theory: a framework for developing, evaluating and implementing complex interventions. *BMC Medicine* 2010; **8**(1): 63.
18. Mansfield A, BMA board of Science. Growing up in the UK: ensuring a healthy future for our children BMA, 2013.
19. Viner RM, Blackburn F, White F, et al. The impact of out-of-hospital models of care on paediatric emergency department presentations. *Archives of Disease in*

1  
2  
3  
4  
5  
6  
7  
8  
9  
10  
11  
12  
13  
14  
15  
16  
17  
18  
19  
20  
21  
22  
23  
24  
25  
26  
27  
28  
29  
30  
31  
32  
33  
34  
35  
36  
37  
38  
39  
40  
41  
42  
43  
44  
45  
46  
47  
48  
49  
50  
51  
52  
53  
54  
55  
56  
57  
58  
59  
60

*Childhood* 2017; archdischild-2017-313307.  
<https://doi.org/10.1136/archdischild-2017-313307>

For peer review only

Table 1. Specification of the Process Evaluation; [x] represents process indicators which are mapped onto figure 1.

| <i>RE-AIM</i>                                        | <i>Definition</i>                                                                                                                | <i>Question</i>                                                                                                                                                                                                                                                                                                                                                                                                                                                                    | <i>Process Indicators [Mapped to Logic Model]</i>                                                                                                                                                                                                                                                                                                                                                                                                                                                                                                   |
|------------------------------------------------------|----------------------------------------------------------------------------------------------------------------------------------|------------------------------------------------------------------------------------------------------------------------------------------------------------------------------------------------------------------------------------------------------------------------------------------------------------------------------------------------------------------------------------------------------------------------------------------------------------------------------------|-----------------------------------------------------------------------------------------------------------------------------------------------------------------------------------------------------------------------------------------------------------------------------------------------------------------------------------------------------------------------------------------------------------------------------------------------------------------------------------------------------------------------------------------------------|
| <i>Dimension</i>                                     |                                                                                                                                  |                                                                                                                                                                                                                                                                                                                                                                                                                                                                                    |                                                                                                                                                                                                                                                                                                                                                                                                                                                                                                                                                     |
| <i>Reach</i>                                         | Per cent and representativeness of individuals receiving the CYPHP Evelina London Model of Care, of total eligible service users | <ul style="list-style-type: none"> <li>• How many CYP participated in or were exposed to the targeted CYPHP services? What proportion of those targeted were reached?</li> <li>• Are those who are most at risk reached by the CYPHP Evelina London model of care? Were those reached representative of the overall population?</li> <li>• What were the barriers to recruitment/retention? To what extent were stakeholders engaged with and aware of the CYPHP model?</li> </ul> | <ul style="list-style-type: none"> <li>• # of CYP accessing CYPHP services/# eligible for targeted CYPHP services and method of recruitment; Data on CYP characteristics within CYPHP (e.g. age, condition, location and socioeconomic breakdown) [R1]</li> <li>• Comparison of demographic and health profiles of CYP participating in CYPHP vs. CYP eligible vs. population of Lambeth and Southwark [R2]</li> <li>• Interviews with CYPHP managers, service providers and commissioners (e.g. barriers to recruitment/retention) [R3]</li> </ul> |
| <i>Effectiveness</i><br><i>Primary and secondary</i> | Impact of CYPHP Evelina London Model of Care on primary and                                                                      | <ul style="list-style-type: none"> <li>• What changes to child health occurred following the implementation of CYPHP?</li> </ul>                                                                                                                                                                                                                                                                                                                                                   | <ul style="list-style-type: none"> <li>• Self-reported physical and mental health; self-reported quality of life; interviews with CYP and</li> </ul>                                                                                                                                                                                                                                                                                                                                                                                                |

1  
2  
3  
4  
5  
6  
7  
8  
9  
10  
11  
12  
13  
14  
15  
16  
17  
18  
19  
20  
21  
22  
23  
24  
25  
26  
27  
28  
29  
30  
31  
32  
33  
34  
35  
36  
37  
38  
39  
40  
41  
42  
43  
44  
45  
46

*outcomes reported elsewhere (see ref)*

secondary outcomes; fidelity of delivery

- What changes to healthcare quality occurred following the implementation of CYPHP?
- What changes to health service use occurred following the implementation of CYPHP?
- What are stakeholder’s perceptions of factors contributing to effectiveness (or ineffectiveness) of CYPHP outcomes?
- Are there any unintended consequences?

- service providers (e.g. child health, empowerment to manage health) [E1]
- # of care plans; adherence to clinical guidelines; time from review to clinical assessment; time from review to clinical assessment; rates of CYP discharge; interviews with CYP and service providers (e.g. holistic care, multidisciplinary working) [E2]
- Non-elective hospital admissions and outpatient use [E3]
- Interviews/focus groups with CYP, commissioners and service (e.g. influence of self-management, confidence and competence in HCPs) [E4]
- Routinely collected data on adverse events (e.g. stakeholder dissatisfaction with service) [E5]

*Adoption*

Proportion and representativeness of settings, commissioners and providers willing to adopt (or commission)

- What is the importance of and how was board agreement to participate in and finance CYPHP, and effective partnership working achieved?

- Interviews with commissioners and CYPHP managers (e.g. finance structures, partnership working). Review of implementation records/logs [A1]

the CYPHP Evelina  
London Model of Care

- What proportion of targeted GP practices adopted CYPHP? Are there differences between GP practices that do or do not adopt CYPHP?
- To what extent are intended stakeholders adopting and complying with the CYPHP program?

- # of GP practices adopting targeted CYPHP services/# of GP practices targeted for CYPHP; Data on GP characteristics within CYPHP (e.g. location, staff numbers, patient numbers) [A2]
- NoMAD surveys completed by service providers; interviews with service providers and commissioners (e.g. adoption and compliance with CYPHP model) [A3]

*Implementation* The extent to which the  
CYPHP Evelina London  
Model of Care is  
delivered as planned

- What CYPHP services are delivered to CYP and service providers?
- To what extent is the CYPHP model being delivered as planned? Who completed the CYPHP intervention work and how this work is done?
- What is the overall satisfaction with CYPHP services and the willingness to implement/commission CYPHP services again?

- # of CYPHP intervention services provided (e.g. number of clinics, training sessions, support packs distributed) [I1]
- # of CYP completing baseline and follow-up health checks in the appropriate time frames; interviews with service providers (e.g. implementation processes); NoMAD surveys completed by service providers [I2]
- Interviews with service providers, CYP and commissioners (e.g. satisfaction with service) and service feedback and satisfaction surveys [I3]



1  
2  
3  
4  
5  
6  
7  
8  
9  
10  
11  
12  
13  
14  
15  
16  
17  
18  
19  
20  
21  
22  
23  
24  
25  
26  
27  
28  
29  
30  
31  
32  
33  
34  
35  
36  
37  
38  
39  
40  
41  
42  
43  
44  
45  
46

- What activities are needed to implement and maintain the CYPHP program?
- What is the acceptability, feasibility and affordability of the program?
- Data on activities as they occur and compare to activities detailed in the logic model. Discrepancies and potential reasons for these will be noted [I4]
- Interviews with service providers and commissioners (e.g. implementation processes) and economic analysis on cost of implementing the CYPHP Evelina London Model of Care program (detailed elsewhere, ref) [I5]

*Maintenance*

Sustainability of the CYPHP Evelina London Model of Care at individual, setting, and geographical/administrative levels

- What are service managers and commissioner intentions to continue the CYPHP service?
- How have aspects of the model been incorporated into usual care; and/or incorporation of models into future business planning?
- Interviews with service providers and commissioners (e.g. intentions to continue CYPHP and other integrated care services) [M1]
- Review of policies and business plans [M2]

*Context*

Healthcare context throughout the CYPHP Evelina London Model of Care implementation period

- How has the current healthcare environment across Lambeth and Southwark influenced the outcomes of the CYPHP trial?
- # and type of healthcare policies introduced to target CYP and service providers across local, national and international, with a focus on tracer conditions [C1]

1  
2  
3 NoMAD – Normalisation Process Theory Scale; CYP – children and young people; CYPHP – Children and Young People’s Health Partnership; HCP –  
4 healthcare provider  
5  
6  
7  
8  
9  
10  
11  
12  
13  
14  
15  
16  
17  
18  
19  
20  
21  
22  
23  
24  
25  
26  
27  
28  
29  
30  
31  
32  
33  
34  
35  
36  
37  
38  
39  
40  
41  
42  
43  
44  
45  
46

For peer review only

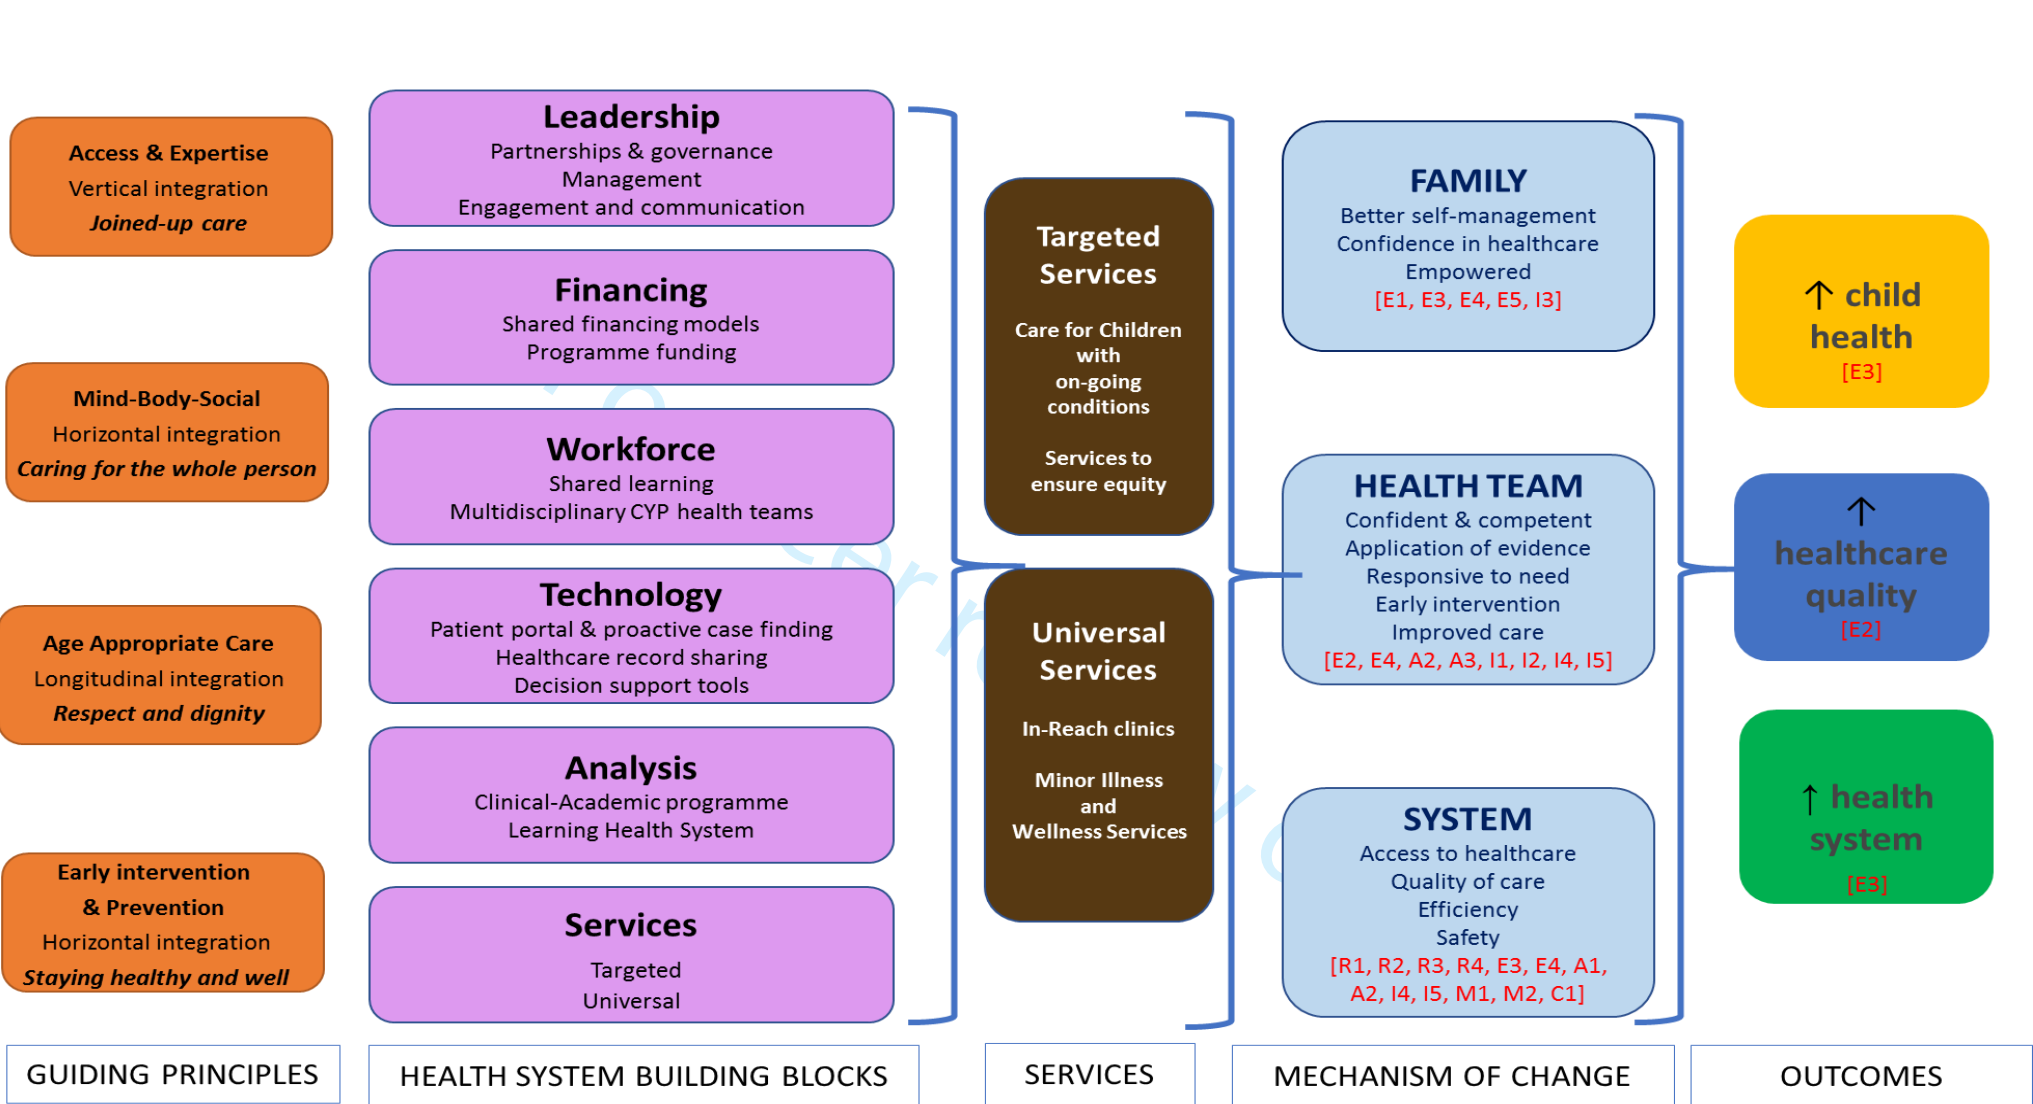

Figure 1. Theoretical Framework for the CYPHP Evelina London Model of Care; [x] represents process indicators which are detailed in Table 1.

# BMJ Open

## The Children and Young People's Health Partnership Evelina London Model of Care: Process Evaluation Protocol

|                                 |                                                                                                                                                                                                                                                                                                                                                                                                                                                                                                                                                                                                                        |
|---------------------------------|------------------------------------------------------------------------------------------------------------------------------------------------------------------------------------------------------------------------------------------------------------------------------------------------------------------------------------------------------------------------------------------------------------------------------------------------------------------------------------------------------------------------------------------------------------------------------------------------------------------------|
| Journal:                        | <i>BMJ Open</i>                                                                                                                                                                                                                                                                                                                                                                                                                                                                                                                                                                                                        |
| Manuscript ID                   | bmjopen-2018-027302.R1                                                                                                                                                                                                                                                                                                                                                                                                                                                                                                                                                                                                 |
| Article Type:                   | Protocol                                                                                                                                                                                                                                                                                                                                                                                                                                                                                                                                                                                                               |
| Date Submitted by the Author:   | 14-Mar-2019                                                                                                                                                                                                                                                                                                                                                                                                                                                                                                                                                                                                            |
| Complete List of Authors:       | Satherley, Rose-Marie; King's College London, Department of Population Health Sciences<br>Green, Judith; Kings College London, Department of Population Health Sciences<br>Sevdalis, Nick; King's College London,<br>Newham, James Joseph; King's College London , Department of Population Health Sciences<br>Elsherbiny , Mohamed; Kings College London, Department of Population Health Sciences<br>Forman, Julia; Kings College London , Department of Population Health Sciences<br>Wolfe, Ingrid; Kings College London, Department of Population Health Sciences<br>Lingam, Raghu; University of New South Wales |
| <b>Primary Subject Heading</b>: | Health services research                                                                                                                                                                                                                                                                                                                                                                                                                                                                                                                                                                                               |
| Secondary Subject Heading:      | General practice / Family practice, Health economics, Health policy, Health services research, Paediatrics                                                                                                                                                                                                                                                                                                                                                                                                                                                                                                             |
| Keywords:                       | Child Health, Process Evaluation, Integrated care                                                                                                                                                                                                                                                                                                                                                                                                                                                                                                                                                                      |
|                                 |                                                                                                                                                                                                                                                                                                                                                                                                                                                                                                                                                                                                                        |

SCHOLARONE™  
Manuscripts

1  
2  
3 **TITLE: The Children and Young People’s Health Partnership Evelina London Model of**  
4 **Care: Process Evaluation Protocol**  
5  
6  
7

8 **AUTHORS:** *Rose-Marie Satherley, Judith Green, Nick Sevdalis, James Newham,*  
9 *Mohamed Elsherbiny, Julia Forman, Ingrid Wolfe \*, Raghu Lingam \* (\*joint last), on*  
10 *behalf of the CYPHP team*  
11  
12  
13

14 **CORESPONDING AUTHOR:** Rose-Marie Satherley Department of Population Health  
15 Sciences, 6th Floor, Room 6.10, Addison House, Guy’s Campus, London, SE1 1UL,  
16 rose-marie.satherley@kcl.ac.uk, 07766918732  
17  
18  
19  
20  
21

22 **FULL AUTHOR LIST:**

23 Judith Green, Department of Population Health Sciences, Kings College London,  
24 London, UK London, UK  
25  
26

27 Nick Sevdalis, Health Services and Population Research Department, Kings College  
28 London, London, UK London, UK  
29  
30

31 James Newham, Department of Population Health Sciences, Kings College London,  
32 London, UK London, UK  
33  
34

35 Mohamed Elsherbiny, Department of Population Health Sciences, Kings College  
36 London, London, UK London, UK  
37  
38

39 Julia Forman, Department of Population Health Sciences, Kings College London,  
40 London, UK London, UK  
41  
42

43 Ingrid Wolfe, Department of Population Health Sciences, Kings College London,  
44 London, UK London, UK  
45  
46

47 Raghu Lingam, School of Women & Children’s Health, University of New South  
48 Wales, Sydney, Australia  
49  
50

51 **WORD COUNT:** 3419  
52  
53  
54  
55  
56  
57  
58  
59  
60

1  
2  
3 **Introduction:** Children and young people (CYP) in the UK have poor health  
4 outcomes, and there is increasing emergency department and hospital outpatient  
5 use. To address these problems in Lambeth and Southwark (two boroughs of  
6 London, UK), the local Clinical Commissioning Groups, Local Authorities, and  
7 Healthcare Providers formed The Children and Young People's Health Partnership  
8 (CYPHP), a clinical-academic programme for improving child health. The Partnership  
9 has developed the CYPHP Evelina London model, an integrated healthcare model  
10 that aims to deliver effective, coordinated care in primary and community settings,  
11 and promote better self-management to over approximately 90,000 CYP in Lambeth  
12 and Southwark. This protocol is for the process evaluation of this model of care.  
13  
14  
15  
16  
17  
18  
19  
20  
21

22 **Methods and Analysis:** Alongside an impact evaluation, an in-depth, mixed-methods  
23 process evaluation will be used to understand the barriers and facilitators to  
24 implementing the model of care. The data collection will be mapped onto a logic  
25 model of how CYPHP is expected to improve child health outcomes. Data collection  
26 and analysis include qualitative interviews and focus groups with stakeholders, a  
27 policy review and a quantitative analysis of routine clinical and administrative data  
28 and questionnaire data. Information relating to the context of the trial that may  
29 affect implementation and/or outcomes of the CYPHP model of care will be  
30 documented.  
31  
32  
33  
34  
35  
36  
37  
38  
39  
40

41 **Ethics and Dissemination:** The study has been reviewed by NHS REC Cornwall &  
42 Plymouth (17/SW/0275). The findings of this process evaluation will guide the scaling  
43 up and implementation of the CYPHP Evelina London Model of Care across the UK.  
44 Findings will be disseminated through publications and conferences, and  
45 implementation manuals and guidance for others working to improve child health  
46 through strengthening health systems.  
47  
48  
49  
50  
51

52  
53 **Trial Registration Number:** Clinicaltrials.gov Identifier: NCT03461848; Pre-results.  
54  
55  
56  
57  
58  
59  
60

### Strengths and Limitations of this Study

- This process evaluation will provide insights into how integrated care programmes can be implemented for children and young people at scale.
- The evaluation using robust mixed quantitative and qualitative methods, is grounded within a theoretically informed logic model and uses the RE-AIM framework.
- Stakeholders may be reluctant to discuss unwillingness to deliver intervention components, or negative perspectives of the model of care.
- Triangulation of data sources will maximise credibility and validity.

1  
2  
3 The state of children's health is a growing concern across the United Kingdom, and  
4 health services and systems contribute to suboptimal outcomes.<sup>1,2</sup> In the context of  
5 increases in the numbers of children and young people (CYP) living with long-term  
6 conditions (physical and psychosocial) and multi-morbidity, current fractures within  
7 the system and healthcare delivery allow individuals to "fall through the gaps" in  
8 care.<sup>3,4</sup>  
9  
10  
11  
12  
13  
14  
15

16 In the United Kingdom, paediatric healthcare models were originally developed to  
17 deliver acute, inpatient, and high intensity specialist services rather than to prevent  
18 illness and disease complications, and maximise well-being and developmental  
19 potential.<sup>5</sup> Despite improvements, current services are not as responsive to families'  
20 needs as they should be, and are often inefficient with a reliance on high cost  
21 emergency department attendance and acute admissions.<sup>5-7</sup> To improve CYP's health,  
22 more effective, evidence-based care models are needed, together with public health,  
23 social and economic policies to promote and protect health. Integrated care models  
24 may represent a solution to problems facing child health services.<sup>5</sup> The CYPHP Evelina  
25 London Model of Care is a new and integrated model of care for CYP that is part of a  
26 health systems strengthening programme.  
27  
28  
29  
30  
31  
32  
33  
34  
35  
36  
37

38 This paper describes the protocol for a mixed methods process evaluation, embedded  
39 within a clustered randomised controlled trial, to assess the impact of a complex  
40 intervention to integrate and improve healthcare, for CYP (the CYPHP Evelina London  
41 Model of Care). CYPHP will deliver services to over approximately 90,000 CYP in  
42 Lambeth and Southwark, two of the most deprived wards in the UK. There is a lack of  
43 comprehensive rigorous evidence about integrated models of care for CYP, the  
44 evaluation of the CYPHP Evelina London model of care will help fill this evidence gap  
45 by providing information on effectiveness and the process of implementing integrated  
46 models of care. This process evaluation aims to complement the clustered randomised  
47 controlled trial of outcomes,<sup>8</sup> to understand how the CYPHP Evelina London Model of  
48 Care achieved its outcomes, and to inform stakeholders about how and why the  
49 CYPHP Evelina Model of Care could be implemented in other settings.  
50  
51  
52  
53  
54  
55  
56  
57  
58  
59  
60



### The intervention: The Children and Young People's Health Partnership (CYPHP) Evelina London Model of Care

The CYPHP Evelina London Model of Care is a complex model comprising several interventions for CYP (0-16 years) and service providers. The aim of all interventions within the CYPHP Evelina London Model of Care is to improve CYP health, healthcare quality and strengthen the health system.

To facilitate the design and operationalisation of the programme, the measurement and analysis of the implementation and outcomes of the CYPHP Evelina London model of care, the components of the programme have been conceptualised as a theoretical framework (or logic model; see Figure 1). The theoretical framework has been guided by the WHO health systems building blocks concept<sup>9</sup> and was developed using workshop methods with the CYPHP programme team and wider stakeholders. The framework in Figure 1 shows how the CYPHP guiding principles (e.g. early intervention and prevention) and health system building blocks (e.g. technology) are in turn reflected in outputs (e.g. interventions and targeted/universal services), that are in turn reflected in outcomes (e.g. improved child health).

The interventions within this framework were guided by the Theoretical Domains Framework (TDF<sup>10</sup>), which describes 12 behavioural domains which interventions may target to influence behaviour change. In brief, the targeted and universal interventions within the CYPHP Model have been designed to targeted barriers to effective management of physical, mental and social determinants of health at both the service-provider and patient-level to maximise behaviour change. In our accompanying paper, the hypothesised active components of each individual intervention have been mapped onto the TDF to evidence the proposed mechanisms of action through which the intervention may become effective.<sup>8</sup> In addition, the mechanism of action across the whole programme, at the service provider, family and system level are detailed in Figure 1.

1  
2  
3 Providing care that is responsive to CYP's needs will be achieved through roll-out of  
4 several universal and targeted services, examples of which are described below:  
5  
6

- 7
- 8 • **Universal Services:** interventions for all eligible CYP and service providers in  
9 Lambeth and Southwark.  
10
    - 11 ○ **Education and Training:** training to improve awareness of difficulties  
12 within CYP's health and provide young person-friendly training to  
13 service providers and school staff. These interventions aim to increase  
14 provider knowledge and skills, to improve delivery of CYP healthcare.  
15
    - 16 ○ **CYPHP Clinics:** integrated child health clinics run by GPs and local  
17 'Patch Paediatricians' in primary care settings. These clinics are  
18 typically for CYP who would otherwise have been referred to hospital  
19 for an outpatient appointment with a general paediatrician. This  
20 intervention provides shared learning opportunities to develop service  
21 provider competence, and encourages team working between  
22 primary-secondary care, to provide better quality care and earlier  
23 access to healthcare for CYP.  
24
  - 25 • **Targeted Services:** interventions for front-line service providers and eligible  
26 CYP with prespecified tracer conditions (asthma, eczema, epilepsy,  
27 constipation). Tracer conditions were chosen as they are examples of long  
28 term and common conditions, which will provide generalisable lessons about  
29 improving outcomes through healthcare for CYP with ongoing conditions with  
30 the intention of designing a generalizable model of care for CYP with common  
31 and chronic conditions as part of a health system response to the  
32 epidemiological transition to chronic disease.  
33
    - 34 ○ **Care for CYP with on-going Conditions:** CYP with tracer conditions are  
35 eligible for a tailored clinical service delivered by the multidisciplinary  
36 CYPHP Health Team in primary and community settings. Care includes  
37 health promotion, preventative and reactive care and all decisions are  
38 documented and shared with GPs through electronic health records.  
39 Through the CYPHP Clinical Team, we anticipate that CYP motivation  
40  
41  
42  
43  
44  
45  
46  
47  
48  
49  
50  
51  
52  
53  
54  
55  
56  
57  
58  
59  
60

1  
2  
3 and goals will be targeted, changing CYP's perceived competence and  
4 knowledge, allowing self-management of health.  
5  
6  
7

8  
9 To aid implementation of the CYPHP Evelina London Model of Care, regular meetings  
10 with primary and secondary care providers, local Clinical Commissioning Groups, GP  
11 Federations, and materials to aid implementation using established behaviour change  
12 techniques were used. The implementation of the CYPHP Evelina London model of  
13 care across Lambeth and Southwark will occur in stages. This phased roll-out allowed  
14 the application of an opportunistic cluster Randomised Controlled Trial (cRCT) design,  
15 where for the first stage (approximately two years) GP practices are randomised to be  
16 offered either the CYPHP model (i.e. delivery of targeted and universal services to  
17 eligible CYP) or enhanced usual care (EUC; i.e. delivery of universal services only to  
18 eligible CYP). Details of the evaluation design are presented in the accompanying  
19 protocol paper.<sup>8</sup>  
20  
21  
22  
23  
24  
25  
26  
27  
28  
29

30  
31 In summary, the evaluation has four component parts: the outcome evaluation  
32 consists of a pseudo-anonymised population-based evaluation for all CYP in  
33 participating GP practices to explore changes in health service use across control and  
34 intervention arms, an evaluation of CYP with selected tracer conditions to  
35 understand changes in health and healthcare across control and intervention arms,  
36 and an economic evaluation to assess the costs of delivery and cost effectiveness of  
37 the CYPHP Evelina London Model of Care across tracer conditions. Alongside the  
38 outcome evaluation, a nested process evaluation, detailed in this paper, aims to  
39 understand how and why the CYPHP Evelina London model is effective or ineffective  
40 in achieving health, healthcare and health service use outcomes, and to identify  
41 contextually relevant strategies for successful implementation as well as practical  
42 difficulties in adoption, delivery, and maintenance to inform wider implementation.  
43  
44  
45  
46  
47  
48  
49  
50  
51  
52  
53

#### 54 [The Process of Implementing a New Clinical Service](#)

55  
56  
57 The process evaluation will focus on measures of implementation success, including  
58 reach, fidelity, adoption, and maintenance of the CYPHP Evelina London Model of  
59  
60

1  
2  
3 Care. Implementation science specifically looks at ways to enhance and promote the  
4 uptake of research findings and evidence-based practices into routine healthcare;  
5 implementation evaluation is therefore a key component of a comprehensive process  
6 evaluation for a complex intervention evaluation.<sup>11,12</sup> Variation in implementation of  
7 the CYPHP Evelina London model of care is inevitable, due to multiple intervention  
8 components, diverse contexts and participants. Practices' differing characteristics  
9 influence their care arrangements for CYP and will affect the roles and expectations  
10 of clinical and administrative staff. Similarly, patients' previous experience and  
11 expectations of care affects care-seeking behaviour. These differences, in the context  
12 of evolving local healthcare environments, policies, and priorities may affect the  
13 successful implementation of the new model of care.<sup>13</sup>

14  
15  
16  
17  
18  
19  
20  
21  
22  
23  
24 Process evaluations need to be designed, delivered, and analysed within a theoretical  
25 framework to allow clearer articulation of research questions, validated instruments  
26 to assess outcomes and theory-driven explanations for success or failure of  
27 implementation efforts. This is essential to understand the mechanisms which  
28 underlie the programme's effectiveness and to application in other populations and  
29 settings. Glasgow's RE-AIM Framework<sup>14</sup> proposes five domains that can influence the  
30 implementation of new services across a range of stakeholders. The framework's five  
31 domains guide the assessment of:

- 32  
33 1. **Reach**, which captures the percentage of people from a given population  
34 who participate in a program and describes their characteristics
- 35  
36 2. **Effectiveness**, which refers to the positive and negative outcomes of the  
37 program
- 38  
39 3. **Adoption**, which is generally defined as the per cent of possible settings (*e.g.*,  
40 organizations) and staff that have agreed to participate in the program
- 41  
42 4. **Implementation**, which is an indicator of the extent to which the program  
43 was delivered as intended and its cost
- 44  
45 5. **Maintenance**, which, at the individual level, reflects maintenance of the  
46 primary outcomes (>6 months)

47  
48  
49  
50  
51  
52  
53  
54  
55  
56  
57  
58 The RE-AIM Framework has been applied to understand intervention impact across a  
59 variety of healthcare settings and acknowledges the value of qualitative data to  
60

1  
2  
3 complement quantitative measures.<sup>15</sup> The core aspects of the RE-AIM Framework will  
4 be incorporated into our process evaluation and used to understand the  
5 interpretation of qualitative findings.  
6  
7  
8

### 9 10 Aim

11 The overall aim of the CYPHP process evaluation is to better understand how and why  
12 the CYPHP Evelina London model of care was effective or ineffective; to identify  
13 contextually relevant strategies for successful implementation; and to identify  
14 practical difficulties and facilitators in adoption, delivery, and maintenance to inform  
15 wider implementation. The overarching questions guiding the evaluation for the  
16 CYPHP Evelina London model of care are:  
17  
18  
19  
20  
21

22  
23 (1) What factors contribute to the effectiveness (or ineffectiveness) of the  
24 CYPHP Evelina London model of care?

25  
26 (2) What factors contribute to successful or challenging implementation across  
27 study sites?  
28  
29

### 30 Methods

#### 31 Patient and Public Involvement

32 The CYPHP Evelina London Model was developed with key stakeholders  
33 including CYP, carers, front line practitioners and health service commissioners.  
34 Stakeholders were involved in the development of the theoretical framework for  
35 CYPHP, identification of research questions and refining the research methodology,  
36 including the development of questions for qualitative interviews and focus groups.  
37  
38  
39  
40  
41  
42  
43

#### 44 Setting/Target Groups for Process Evaluation

45 The intervention components of the CYPHP Evelina London Model of Care are  
46 situated in primary care settings and the community. These interventions target  
47 service providers (GP receptionists, practice nurses, primary care providers), CYP and  
48 families. Commissioners of healthcare services in Lambeth and Southwark are not  
49 directly targeted by the intervention components, but as influential participants,  
50 they are included in the process evaluation.  
51  
52  
53  
54  
55  
56  
57  
58  
59  
60

### Data Collection

The process evaluation will use a mixed methods approach to data collection and analysis. We will use the following methods of data collection: **1)** surveys of all stakeholders; **2)** analysis of routine clinical and administrative data; **3)** interviews and/or focus groups with stakeholders; and **4)** a review of policy documents during the planning and delivery of the CYPHP Evelina Model of Care. Data collection will be guided by the RE-AIM framework. The process indicators as per the RE-AIM framework are mapped into the logic model and presented in Table 1.

For peer review only

Table 1. Specification of the Process Evaluation; [x] represents process indicators which are mapped onto figure 1.

| RE-AIM    | Definition                                                                                                                       | Question                                                                                                                                                                                                                                                                                                                                                                                                                                                                    | Process Indicators [Mapped to Logic Model]                                                                                                                                                                                                                                                                                                                                                                                                                                                                                                    |
|-----------|----------------------------------------------------------------------------------------------------------------------------------|-----------------------------------------------------------------------------------------------------------------------------------------------------------------------------------------------------------------------------------------------------------------------------------------------------------------------------------------------------------------------------------------------------------------------------------------------------------------------------|-----------------------------------------------------------------------------------------------------------------------------------------------------------------------------------------------------------------------------------------------------------------------------------------------------------------------------------------------------------------------------------------------------------------------------------------------------------------------------------------------------------------------------------------------|
| Dimension |                                                                                                                                  |                                                                                                                                                                                                                                                                                                                                                                                                                                                                             |                                                                                                                                                                                                                                                                                                                                                                                                                                                                                                                                               |
| Reach     | Per cent and representativeness of individuals receiving the CYPHP Evelina London Model of Care, of total eligible service users | <ul style="list-style-type: none"> <li>How many CYP participated in or were exposed to the CYPHP program?</li> <li>What proportion of those targeted were reached?</li> <li>Are those who are most at risk reached by the CYPHP Evelina London model of care? Were those reached representative of the overall population?</li> <li>What were the barriers to recruitment/retention? To what extent were stakeholders engaged with and aware of the CYPHP model?</li> </ul> | <ul style="list-style-type: none"> <li># of CYP accessing CYPHP services/# eligible for targeted CYPHP services and method of recruitment; Data on CYP characteristics within CYPHP (e.g. age, condition, location and socioeconomic breakdown) [R1]</li> <li>Comparison of demographic and health profiles of CYP participating in CYPHP vs. CYP eligible vs. population of Lambeth and Southwark [R2]</li> <li>Interviews with CYPHP managers, service providers and commissioners (e.g. barriers to recruitment/retention) [R3]</li> </ul> |

|                                                                                                                                   |                                                                                                                                                    |                                                                                                                                                                                                                                                                                                                                                                   |                                                                                                                                                                                                                                                                                                                                                                                                            |
|-----------------------------------------------------------------------------------------------------------------------------------|----------------------------------------------------------------------------------------------------------------------------------------------------|-------------------------------------------------------------------------------------------------------------------------------------------------------------------------------------------------------------------------------------------------------------------------------------------------------------------------------------------------------------------|------------------------------------------------------------------------------------------------------------------------------------------------------------------------------------------------------------------------------------------------------------------------------------------------------------------------------------------------------------------------------------------------------------|
| 1<br>2<br>3<br>4<br>5<br>6<br>7<br>8<br>9<br>10<br>11<br>12<br>13<br>14<br>15<br>16<br><i>Effectiveness</i>                       | Impact of CYPHP Evelina London Model of Care on trial outcomes (reported elsewhere) [E1, E2]; fidelity of delivery                                 | <ul style="list-style-type: none"> <li>• What are the conditions and mechanisms that lead to trial outcomes? What explains variation in trial outcomes across sites?</li> <li>• What are stakeholder's perceptions of factors contributing to effectiveness (or ineffectiveness) of trial outcomes?</li> <li>• Are there any unintended consequences?</li> </ul>  | <ul style="list-style-type: none"> <li>• # of care plans; adherence to clinical guidelines; time from review to clinical assessment; time from review to clinical assessment; rates of CYP discharge [E2]</li> <li>• Interviews/focus groups with CYP, commissioners and service (e.g. key components to ensure behavioural change) [E4, E5]</li> </ul>                                                    |
| 17<br>18<br>19<br>20<br>21<br>22<br>23<br>24<br>25<br>26<br>27<br>28<br>29<br>30<br>31<br>32<br>33<br>34<br>35<br><i>Adoption</i> | Proportion and representativeness of settings, commissioners and providers willing to adopt (or commission) the CYPHP Evelina London Model of Care | <ul style="list-style-type: none"> <li>• What proportion of targeted GP practices adopted CYPHP? Are there differences between GP practices and service providers that do or do not adopt CYPHP?</li> <li>• What affects stakeholder participation?</li> <li>• To what extent are intended stakeholders adopting and complying with the CYPHP program?</li> </ul> | <ul style="list-style-type: none"> <li>• # of GP practices adopting targeted CYPHP services/# of GP practices targeted for CYPHP; Data on GP characteristics within CYPHP (e.g. location, staff numbers, patient numbers) [A2]</li> <li>• Review of implementation records/logs, NoMAD surveys completed by service providers to guide interviews with high adopters and low adopters. [A1, A3]</li> </ul> |



1 The extent to which the  
2 CYPHP Evelina London  
3  
4 Model of Care is delivered  
5  
6 as planned  
7  
8  
9  
10  
11  
12  
13  
14  
15  
16  
17  
18  
19  
20  
21  
22  
23  
24  
25  
26  
27  
28  
29  
30  
31  
32  
33  
34  
35  
36  
37  
38  
39  
40  
41  
42  
43  
44  
45  
46

- What CYPHP services are delivered to CYP and service providers?
- To what extent is the CYPHP model being delivered as planned? Who completed the CYPHP intervention work and how this work is done?
- What is the overall satisfaction with CYPHP services and the willingness to implement/commission CYPHP services again?
- What activities are needed to implement and maintain the CYPHP program?
- What is the acceptability, feasibility and affordability of the program?

- # of CYPHP intervention services provided (e.g. number of clinics, training sessions, support packs distributed) **[I1]**
- # of CYP completing baseline and follow-up health checks in the appropriate time frames; interviews with service providers (e.g. implementation processes); NoMAD surveys completed by service providers **[I2]**
- Interviews with service providers, CYP and commissioners (e.g. satisfaction with service) and service feedback and satisfaction surveys **[I3]**
- Data on activities as they occur and compare to activities detailed in the logic model. Discrepancies and potential reasons for these will be noted **[I4]**
- Interviews with service providers and commissioners (e.g. implementation processes) and economic analysis on cost of implementing the CYPHP Evelina London Model of Care program (detailed elsewhere<sup>8</sup>) **[I5]**

Implementation

|                                                                                                           |                                                                                                                                        |                                                                                                                                                                                                                                                                                                                                                                                  |                                                                                                                                                                                                                                                         |
|-----------------------------------------------------------------------------------------------------------|----------------------------------------------------------------------------------------------------------------------------------------|----------------------------------------------------------------------------------------------------------------------------------------------------------------------------------------------------------------------------------------------------------------------------------------------------------------------------------------------------------------------------------|---------------------------------------------------------------------------------------------------------------------------------------------------------------------------------------------------------------------------------------------------------|
| 1<br>2<br>3<br>4<br>5<br>6<br>7<br>8<br>9<br>10<br>11<br>12<br>13<br>14<br>15<br>16<br><i>Maintenance</i> | Sustainability of the CYPHP<br>Evelina London Model of<br>Care at individual, setting,<br>and<br>geographical/administrative<br>levels | <ul style="list-style-type: none"> <li>• What are service managers and commissioner intentions to continue integrated care services for CYP, and what are the barriers to maintaining this way of working?</li> <li>• How have aspects of the model been incorporated into usual care; and/or incorporation of integrated care for CYP into future business planning?</li> </ul> | <ul style="list-style-type: none"> <li>• Interviews with service providers and commissioners (e.g. intentions to continue CYPHP and other integrated care services) <b>[M1]</b></li> <li>• Review of policies and business plans <b>[M2]</b></li> </ul> |
| 17<br>18<br>19<br>20<br>21<br>22<br>23<br><i>Context</i>                                                  | Healthcare context<br>throughout the CYPHP<br>Evelina London Model of<br>Care implementation period                                    | <ul style="list-style-type: none"> <li>• How has the current healthcare environment across Lambeth and Southwark influenced the outcomes of the CYPHP trial?</li> </ul>                                                                                                                                                                                                          | <ul style="list-style-type: none"> <li>• # and type of healthcare policies introduced to target CYP and service providers across local, national and international, with a focus on tracer conditions <b>[C1]</b></li> </ul>                            |

NoMAD – Normalisation Process Theory Scale; CYP – children and young people; CYPHP – Children and Young People’s Health Partnership; HCP – healthcare provider

## Surveys of all Stakeholders

All primary care service providers participating in the intervention arms of the CYPHP Evelina Model of Care will be invited to complete the Normalisation Process Theory tool (NoMAD).<sup>16</sup> Normalisation Process Theory (NPT)<sup>17</sup> focuses on the implementation of new practices and how these new practices become embedded and sustained in their social contexts and the NoMAD is the NPT's accompanying tool. The NoMAD tool consists of 23 items that measure the process of implementation from the perspectives of professionals directly involved in implementing complex interventions. The NoMAD tool was selected as it is the first validated measure to assess implementation processes and can be used across multiple stakeholders and settings, providing insight into the adoption of new services at the service provider level. In addition, routinely collected service satisfaction data from CYP and family surveys will be audited to assess satisfaction with the CYPHP services. Surveys will be distributed across service provider and commissioner channels across Lambeth and Southwark (e.g. GP events, mailing lists, and locality meetings), after implementation of the full CYPHP Evelina London Model of Care. The quantitative data collected from the NoMAD tool and service satisfaction questionnaires will be analysed using descriptive statistics.

### 2) Routine Clinical and Administrative Data

Routinely collected data will be used to assess the proportion of service users and service providers who participate in each part of the CYPHP Evelina Model of Care (outlined in Figure 1). Outcomes of service users who receive any element of the CYPHP Evelina London Model of Care and description of any relevant adverse clinical events will be documented (as detailed in Table One).

GP practices in the intervention arm will be profiled for size, organisational characteristics, GP characteristics (e.g. number and whole time equivalent of GP partners and salaried staff, years qualified, proportion who have additional paediatric qualifications or special interests in child health), and the number of patients registered with the practice. This will facilitate assessment of practice context and effects of contextual variation. The quantitative data collected from all

1  
2  
3 practices will be analysed using descriptive statistics to provide information about  
4 the differential implementation rates of the intervention components of the CYPHP  
5 Evelina London Model of Care. This will be related to trial outcomes and will  
6 facilitate comparison of practices regarding implementation fidelity and reach.  
7  
8  
9

### 10 11 **3) Interviews and/or Focus Groups with all Stakeholders** 12

13  
14 Qualitative data will be collected through interviews and focus groups with  
15 commissioners, service providers, CYP and families who have participated in any  
16 component of the intervention arm of the CYPHP Evelina Model of Care. CYP and  
17 families will be invited to take part in a focus group or interview after discharge from  
18 the CYPHP Evelina London Model of Care. Children under 12 years will only participate  
19 alongside their carer. Families will be reimbursed for any travel expenses, but no other  
20 form of incentive will be offered.  
21  
22  
23  
24  
25  
26

27  
28 Sampling will be purposive rather than statistical, to include CYP and families from  
29 diverse settings with a wide range of circumstances that may influence responsiveness  
30 and accessibility to healthcare. Families will be contacted via the researcher, who is  
31 blinded to time, intensity or outcome of treatment.  
32  
33  
34

35  
36 Topic guides aim to elucidate narrative data on: the experience of CYPHP  
37 interventions, healthcare use, self-management and perspectives on care. A range of  
38 appropriate art-based methods (e.g. pipe cleaners, drawing, puppets) will be used to  
39 engage younger children in the discussions.<sup>18</sup> A facilitator, who is experienced in  
40 working with CYP and families, will guide discussions, which will be audio-recorded.  
41  
42  
43  
44

45  
46 Primary care service providers involved in the delivery of the CYPHP Evelina London  
47 Model of Care will be invited to take part in one-to-one interviews. Completion of  
48 NoMAD surveys and administrative data (previously described) will be used as an  
49 indicator of engagement and implementation strength to inform recruitment of  
50 service providers to these interviews. This will result in sufficient heterogeneity to  
51 provide examples of relatively poor and good adoption, delivery and maintenance,  
52 and will allow us to identify barriers and facilitators to implementation and to  
53 generate hypotheses about factors that may be associated with differing outcomes.  
54  
55  
56  
57  
58  
59  
60

1  
2  
3 Topic guides explore common issues when working with the CYPHP Evelina London  
4 Model of Care, the perceived effectiveness of the model, the use and understanding  
5 of the model of care, and changes in practice attributed to the model of care.  
6  
7  
8

9  
10 Topic guides for interviews with commissioners of healthcare services in Lambeth and  
11 Southwark are designed to elicit perceptions on the motivation for commissioning  
12 child health service programmes including the CYPHP Evelina London Model of Care,  
13 the ambitions for the model of care, and the facilitators and barriers to commissioning  
14 healthcare services within Lambeth and Southwark.  
15  
16  
17

18  
19  
20 Analysis of qualitative data will be largely inductive, drawing on the principles of  
21 thematic analysis, but informed by the RE-AIM Framework.<sup>19,20</sup> Inductive themes  
22 will emerge through repeated examination and comparison; tabulation; and  
23 mapping. In reports, they will be illustrated with anonymised verbatim quotes from  
24 participants.  
25  
26  
27  
28

#### 29 30 **4) Review of Policy Documents** 31

32  
33 Information relating to the context of the trial that may affect the implementation  
34 and/or outcomes of the CYPHP Evelina London model of care will be documented.  
35 In addition, a review of policy documents over the duration of the CYPHP trial will  
36 take place. Information will be reviewed, and relevant information extracted into a  
37 timeline. The timeline will be available to consult when results from other sources  
38 (both quantitative and qualitative) begin to emerge, to understand patterns  
39 appearing in those data over time and between health centres and catchment  
40 areas.  
41  
42  
43  
44  
45  
46  
47

#### 48 **Triangulation of Data Sources** 49

50  
51  
52 Credibility and validity will be maximised through cross verification and exploration of  
53 differences between the outcomes of the various methods. This takes place in four  
54 ways:  
55  
56  
57  
58  
59  
60

- 1  
2  
3 1. Maximising validity in analysis of qualitative data within the research team by  
4 techniques such as discussing coding, constant comparison, accounting for  
5 deviant cases, systematic coding.  
6  
7
- 8 2. Triangulation of interviews with results from the NoMAD questionnaire,  
9 exploring and accounting for differences.  
10  
11
- 12 3. Mapping the perspectives of commissioners, service managers, healthcare  
13 providers, CYP and caregivers to give a complete view of stakeholder  
14 perspectives.  
15  
16
- 17 4. Conducting multiple focus groups sampled from service user, managers and  
18 commissioners in different GP clusters  
19  
20  
21  
22

### 23 **Ethics and Dissemination**

24  
25  
26 This process evaluation has been reviewed by NHS REC Cornwall & Plymouth  
27 (17/SW/0275). The study has been registered with Clinicaltrials.gov (Identifier:  
28 NCT03461848; Pre-results). The results of the study will be disseminated via  
29 presentations at local, national and international conferences, peer-reviewed journals  
30 and workshops with all stakeholders. The findings of this process evaluation will be  
31 crucial for scaling up implementation both within and outside of the boroughs of  
32 Lambeth and Southwark, London.  
33  
34  
35  
36  
37  
38  
39

### 40 **Discussion**

41  
42  
43 Current paediatric healthcare models were developed to deliver acute inpatient and  
44 high intensity specialist services rather than high quality care for children with long-  
45 term conditions who need multidisciplinary, coordinated and planned care to prevent  
46 illness and disease complications and to maximize wellbeing and developmental  
47 potential.<sup>21</sup> As a result, integrated care models have been proposed as a solution to  
48 improve child health services worldwide.<sup>5</sup> Integrated care models have the potential  
49 to make an important contribution towards improving child health. Although this  
50 hypothesis is plausible and is the basis of a great deal of policy, evidence is still indirect  
51 and limited. Therefore, a thorough evaluation of the processes through which such  
52  
53  
54  
55  
56  
57  
58  
59  
60

1  
2  
3 integrated care programmes for children and young people are implemented is timely  
4 and important.  
5  
6

7  
8 While we have made every effort to ensure the rigour of the process evaluation, the  
9 assessment of fidelity largely relies on self-report through service provider interviews  
10 and/or questionnaires. Service providers may be reluctant to talk about unwillingness  
11 to deliver intervention components or may not have the skills or be comfortable to  
12 rate their own competence. Piloting interview guides has enabled us to improve these  
13 procedures to reduce the risk of social desirability bias. Our purposive sampling  
14 methods will collect data from an array of participants and ensure data collection will  
15 continue until saturation.  
16  
17

18  
19 A large part of this process evaluation focuses on four tracer conditions to understand  
20 the implementation of integrated care models for CYP. These conditions were  
21 selected with the intention of designing a generalizable model of care for CYP with  
22 common and chronic conditions as part of a health system response to the  
23 epidemiological transition to chronic disease. In addition, by selecting four tracer  
24 conditions we will be able to examine the parallels and divergences across a range of  
25 conditions, to support us in understanding how integrated care may be applied to a  
26 variety of conditions. However, these findings should be treated with caution and  
27 applying these findings to other conditions to another should be done cautiously.  
28  
29

30  
31 Given the complexity of the proposed interventions and the variability in both the  
32 target population and service providers, it is challenging to understand the nuances  
33 of implementing the CYPHP Evelina London Model of Care. However, by ensuring the  
34 inclusion of all stakeholders within the model, we hope to achieve a greater insight  
35 into how integrated care can be implemented for children and young people. We  
36 anticipate that this process evaluation will allow us to provide a comprehensive  
37 understanding of how outcomes were achieved by the program and how to  
38 implement programmes and integrated care models of this nature in alternative  
39 settings.  
40  
41  
42  
43  
44  
45  
46  
47  
48  
49  
50  
51  
52  
53  
54  
55  
56  
57  
58  
59  
60

1  
2  
3 **Authors' contributions:** RS was responsible for writing the first draft of the protocol.  
4 RS, JG, NS, JN, ME, JF, RL and IW were involved in the study design and in obtaining  
5 ethical approvals. RL and IW were responsible for study conception. All authors  
6 commented on the manuscript and agreed with the final version.  
7  
8  
9

10  
11  
12 **Funding statement:** This work was supported by Guys and St Thomas Charity, grant  
13 number HIF180101KCL.  
14  
15

16  
17 **Competing interests' statement:** No authors have any conflicts of interest to  
18 declare.  
19  
20

## 21 **Figure Legends**

22  
23 *Table 1. Specification of the Process Evaluation;* [x] represents process indicators  
24 which are mapped onto figure 1.  
25  
26

27  
28  
29  
30 Figure 1. Theoretical Framework for the CYPHP Evelina London Model of Care; [x]  
31 represents process indicators which are detailed in Table 1. The CYPHP Evelina  
32 London Model of Care provides numerous universal and targeted services; the  
33  
34  
35  
36  
37  
38  
39  
40  
41  
42  
43  
44  
45  
46  
47  
48  
49  
50  
51  
52  
53  
54  
55  
56  
57  
58  
59  
60  
61  
62  
63  
64  
65  
66  
67  
68  
69  
70  
71  
72  
73  
74  
75  
76  
77  
78  
79  
80  
81  
82  
83  
84  
85  
86  
87  
88  
89  
90  
91  
92  
93  
94  
95  
96  
97  
98  
99  
100  
101  
102  
103  
104  
105  
106  
107  
108  
109  
110  
111  
112  
113  
114  
115  
116  
117  
118  
119  
120  
121  
122  
123  
124  
125  
126  
127  
128  
129  
130  
131  
132  
133  
134  
135  
136  
137  
138  
139  
140  
141  
142  
143  
144  
145  
146  
147  
148  
149  
150  
151  
152  
153  
154  
155  
156  
157  
158  
159  
160  
161  
162  
163  
164  
165  
166  
167  
168  
169  
170  
171  
172  
173  
174  
175  
176  
177  
178  
179  
180  
181  
182  
183  
184  
185  
186  
187  
188  
189  
190  
191  
192  
193  
194  
195  
196  
197  
198  
199  
200  
201  
202  
203  
204  
205  
206  
207  
208  
209  
210  
211  
212  
213  
214  
215  
216  
217  
218  
219  
220  
221  
222  
223  
224  
225  
226  
227  
228  
229  
230  
231  
232  
233  
234  
235  
236  
237  
238  
239  
240  
241  
242  
243  
244  
245  
246  
247  
248  
249  
250  
251  
252  
253  
254  
255  
256  
257  
258  
259  
260  
261  
262  
263  
264  
265  
266  
267  
268  
269  
270  
271  
272  
273  
274  
275  
276  
277  
278  
279  
280  
281  
282  
283  
284  
285  
286  
287  
288  
289  
290  
291  
292  
293  
294  
295  
296  
297  
298  
299  
300  
301  
302  
303  
304  
305  
306  
307  
308  
309  
310  
311  
312  
313  
314  
315  
316  
317  
318  
319  
320  
321  
322  
323  
324  
325  
326  
327  
328  
329  
330  
331  
332  
333  
334  
335  
336  
337  
338  
339  
340  
341  
342  
343  
344  
345  
346  
347  
348  
349  
350  
351  
352  
353  
354  
355  
356  
357  
358  
359  
360  
361  
362  
363  
364  
365  
366  
367  
368  
369  
370  
371  
372  
373  
374  
375  
376  
377  
378  
379  
380  
381  
382  
383  
384  
385  
386  
387  
388  
389  
390  
391  
392  
393  
394  
395  
396  
397  
398  
399  
400  
401  
402  
403  
404  
405  
406  
407  
408  
409  
410  
411  
412  
413  
414  
415  
416  
417  
418  
419  
420  
421  
422  
423  
424  
425  
426  
427  
428  
429  
430  
431  
432  
433  
434  
435  
436  
437  
438  
439  
440  
441  
442  
443  
444  
445  
446  
447  
448  
449  
450  
451  
452  
453  
454  
455  
456  
457  
458  
459  
460  
461  
462  
463  
464  
465  
466  
467  
468  
469  
470  
471  
472  
473  
474  
475  
476  
477  
478  
479  
480  
481  
482  
483  
484  
485  
486  
487  
488  
489  
490  
491  
492  
493  
494  
495  
496  
497  
498  
499  
500  
501  
502  
503  
504  
505  
506  
507  
508  
509  
510  
511  
512  
513  
514  
515  
516  
517  
518  
519  
520  
521  
522  
523  
524  
525  
526  
527  
528  
529  
530  
531  
532  
533  
534  
535  
536  
537  
538  
539  
540  
541  
542  
543  
544  
545  
546  
547  
548  
549  
550  
551  
552  
553  
554  
555  
556  
557  
558  
559  
560  
561  
562  
563  
564  
565  
566  
567  
568  
569  
570  
571  
572  
573  
574  
575  
576  
577  
578  
579  
580  
581  
582  
583  
584  
585  
586  
587  
588  
589  
590  
591  
592  
593  
594  
595  
596  
597  
598  
599  
600  
601  
602  
603  
604  
605  
606  
607  
608  
609  
610  
611  
612  
613  
614  
615  
616  
617  
618  
619  
620  
621  
622  
623  
624  
625  
626  
627  
628  
629  
630  
631  
632  
633  
634  
635  
636  
637  
638  
639  
640  
641  
642  
643  
644  
645  
646  
647  
648  
649  
650  
651  
652  
653  
654  
655  
656  
657  
658  
659  
660  
661  
662  
663  
664  
665  
666  
667  
668  
669  
670  
671  
672  
673  
674  
675  
676  
677  
678  
679  
680  
681  
682  
683  
684  
685  
686  
687  
688  
689  
690  
691  
692  
693  
694  
695  
696  
697  
698  
699  
700  
701  
702  
703  
704  
705  
706  
707  
708  
709  
710  
711  
712  
713  
714  
715  
716  
717  
718  
719  
720  
721  
722  
723  
724  
725  
726  
727  
728  
729  
730  
731  
732  
733  
734  
735  
736  
737  
738  
739  
740  
741  
742  
743  
744  
745  
746  
747  
748  
749  
750  
751  
752  
753  
754  
755  
756  
757  
758  
759  
760  
761  
762  
763  
764  
765  
766  
767  
768  
769  
770  
771  
772  
773  
774  
775  
776  
777  
778  
779  
780  
781  
782  
783  
784  
785  
786  
787  
788  
789  
790  
791  
792  
793  
794  
795  
796  
797  
798  
799  
800  
801  
802  
803  
804  
805  
806  
807  
808  
809  
810  
811  
812  
813  
814  
815  
816  
817  
818  
819  
820  
821  
822  
823  
824  
825  
826  
827  
828  
829  
830  
831  
832  
833  
834  
835  
836  
837  
838  
839  
840  
841  
842  
843  
844  
845  
846  
847  
848  
849  
850  
851  
852  
853  
854  
855  
856  
857  
858  
859  
860  
861  
862  
863  
864  
865  
866  
867  
868  
869  
870  
871  
872  
873  
874  
875  
876  
877  
878  
879  
880  
881  
882  
883  
884  
885  
886  
887  
888  
889  
890  
891  
892  
893  
894  
895  
896  
897  
898  
899  
900  
901  
902  
903  
904  
905  
906  
907  
908  
909  
910  
911  
912  
913  
914  
915  
916  
917  
918  
919  
920  
921  
922  
923  
924  
925  
926  
927  
928  
929  
930  
931  
932  
933  
934  
935  
936  
937  
938  
939  
940  
941  
942  
943  
944  
945  
946  
947  
948  
949  
950  
951  
952  
953  
954  
955  
956  
957  
958  
959  
960  
961  
962  
963  
964  
965  
966  
967  
968  
969  
970  
971  
972  
973  
974  
975  
976  
977  
978  
979  
980  
981  
982  
983  
984  
985  
986  
987  
988  
989  
990  
991  
992  
993  
994  
995  
996  
997  
998  
999  
1000



## References

1. Wolfe I, Mandeville K, Harrison K, et al. Child survival in England: Strengthening governance for health. *Health Policy* 2017; **121**(11): 1131-1138. <https://doi:10.1016/j.healthpol.2017.09.004>
2. Viner RM. *State of Child Health: Report*. London: Royal College of Paediatrics & Child Health, 2017.
3. Wolfe I, Cass H, Thompson M J, et al. Improving child health services in the UK: insights from Europe and their implications for the NHS reforms. *British Medical Journal* 2011; **342**: 1277. <https://doi:10.1136/bmj.d1277>
4. Were WM, Daelmans B, Bhutta Z, et al. Children's health priorities and interventions. *British Medical Journal* 2015; **351**: h4300. <https://doi.org/10.1136/bmj.h4300>
5. Wolfe I, Thompson M, Gill P, et al. Health services for children in western Europe. *Lancet* 2013; **381**(9873):1224-34.
6. Mansfield A, BMA board of Science. Growing up in the UK: ensuring a healthy future for our children BMA, 2013. [https://www.bma.org.uk/collective-voice/policy-and-research/public-and-population-health/child-health/growing-up-in-the-uk\\_\(accessed 15 Oct 2018\)](https://www.bma.org.uk/collective-voice/policy-and-research/public-and-population-health/child-health/growing-up-in-the-uk_(accessed%2015%20Oct%202018)).
7. Viner RM, Blackburn F, White F, et al. The impact of out-of-hospital models of care on paediatric emergency department presentations. *Arch Dis Child* 2018; **103**(2): 128-136.
8. Newham JJ, Forman JR, Heys M, et al. The Children and Young People's Health Partnership (CYPHP) Evelina London Model of Care: Protocol for an opportunistic cluster randomised evaluation (cRCT) to assess child health outcomes, healthcare quality and health service use. *Submitted to BMJ Open, 2018*.
9. World Health Organisation (2010). *Monitoring the building blocks of health systems: A handbook of indicators and their measurement strategies*. Geneva, Switzerland.
10. Michie S, Johnston M, Abraham C, et al. Making psychological theory useful for implementing evidence based practice: a consensus approach. *Quality*

- 1  
2  
3 *and Safety in Health Care* 2005; **14**(1): 26-33.  
4 <https://doi.org/10.1136/qshc.2004.011155>  
5  
6  
7 11. Moore GF, Audrey S, Barker M, et al. Process evaluation of complex  
8 interventions: Medical Research Council guidance. *British Medical Journal*  
9 2015; **350**: h1258. <https://doi.org/10.1136/bmj.h1258>  
10  
11  
12 12. Oakley A, Strange V, Bonell C, et al. Process evaluation in randomised  
13 controlled trials of complex interventions. *British Medical Journal*  
14 2006; **332**(7538): 413–416. <https://doi.org/10.1136/bmj.332.7538.413>  
15  
16  
17 13. Linnan L, Steckler A. Process evaluation for public health interventions and  
18 research: an overview. In: Linnan L, Steckler A, editors. *Process Evaluation for*  
19 *Public Health Interventions and Research*. San Francisco, CA: Jossey-Bass;  
20 2002. pp. 2–24.  
21  
22  
23 14. Glasgow RE, Vogt TM, Boles SM. Evaluating the public health impact of health  
24 promotion interventions: the RE-AIM framework. *American Journal of Public*  
25 *Health* 1999; **89**(9): 1322–1327.  
26  
27  
28 15. Kessler RS, Purcell EP, Glasgow RE, et al. What does it mean to “employ” the  
29 RE-AIM model? *Evaluation & the Health Professions* 2013; **36**(1): 44–66.  
30 <https://doi.org/10.1177/0163278712446066>  
31  
32  
33 16. Finch TL, Girling M, May CR. et al. Improving the normalization of complex  
34 interventions: part 2 – validation of the NoMAD instrument for assessing  
35 implementation work based on normalization process theory (NPT). *BMC*  
36 *Medical Research Methodology* 2018; **18**(135):  
37 <https://doi.org/10.1186/s12874-018-0591-x>  
38  
39  
40 17. Coad J. Using art-based techniques in engaging children and young people in  
41 health care consultations and/or research. *Journal of Research in Nursing*  
42 2007; **12**(5): 487–497.  
43  
44  
45 18. Braun V, Clarke V. Using thematic analysis in psychology. *Qualitative*  
46 *Research in Psychology* 2006; **3**(2): 77–101.  
47 <https://doi.org/10.1191/1478088706qp063oa>  
48  
49  
50 19. Murray E, Treweek S, Pope C. et al. Normalisation process theory: a  
51 framework for developing, evaluating and implementing complex  
52 interventions. *BMC Medicine* 2010; **8**(1): 63.  
53  
54  
55  
56  
57  
58  
59  
60

- 1  
2  
3 20. Mansfield A, BMA board of Science. Growing up in the UK: ensuring a healthy  
4 future for our children BMA, 2013.  
5  
6  
7 21. Viner RM, Blackburn F, White F, et al. The impact of out-of-hospital models of  
8 care on paediatric emergency department presentations. *Archives of Disease*  
9 *in Childhood* 2017; archdischild-2017-313307.  
10  
11 <https://doi.org/10.1136/archdischild-2017-313307>  
12  
13  
14  
15  
16  
17  
18  
19  
20  
21  
22  
23  
24  
25  
26  
27  
28  
29  
30  
31  
32  
33  
34  
35  
36  
37  
38  
39  
40  
41  
42  
43  
44  
45  
46  
47  
48  
49  
50  
51  
52  
53  
54  
55  
56  
57  
58  
59  
60

For peer review only

1  
2  
3  
4  
5  
6  
7  
8  
9  
10  
11  
12  
13  
14  
15  
16  
17  
18  
19  
20  
21  
22  
23  
24  
25  
26  
27  
28  
29  
30  
31  
32  
33  
34  
35  
36  
37  
38  
39  
40  
41  
42  
43  
44  
45  
46  
47  
48  
49  
50  
51  
52

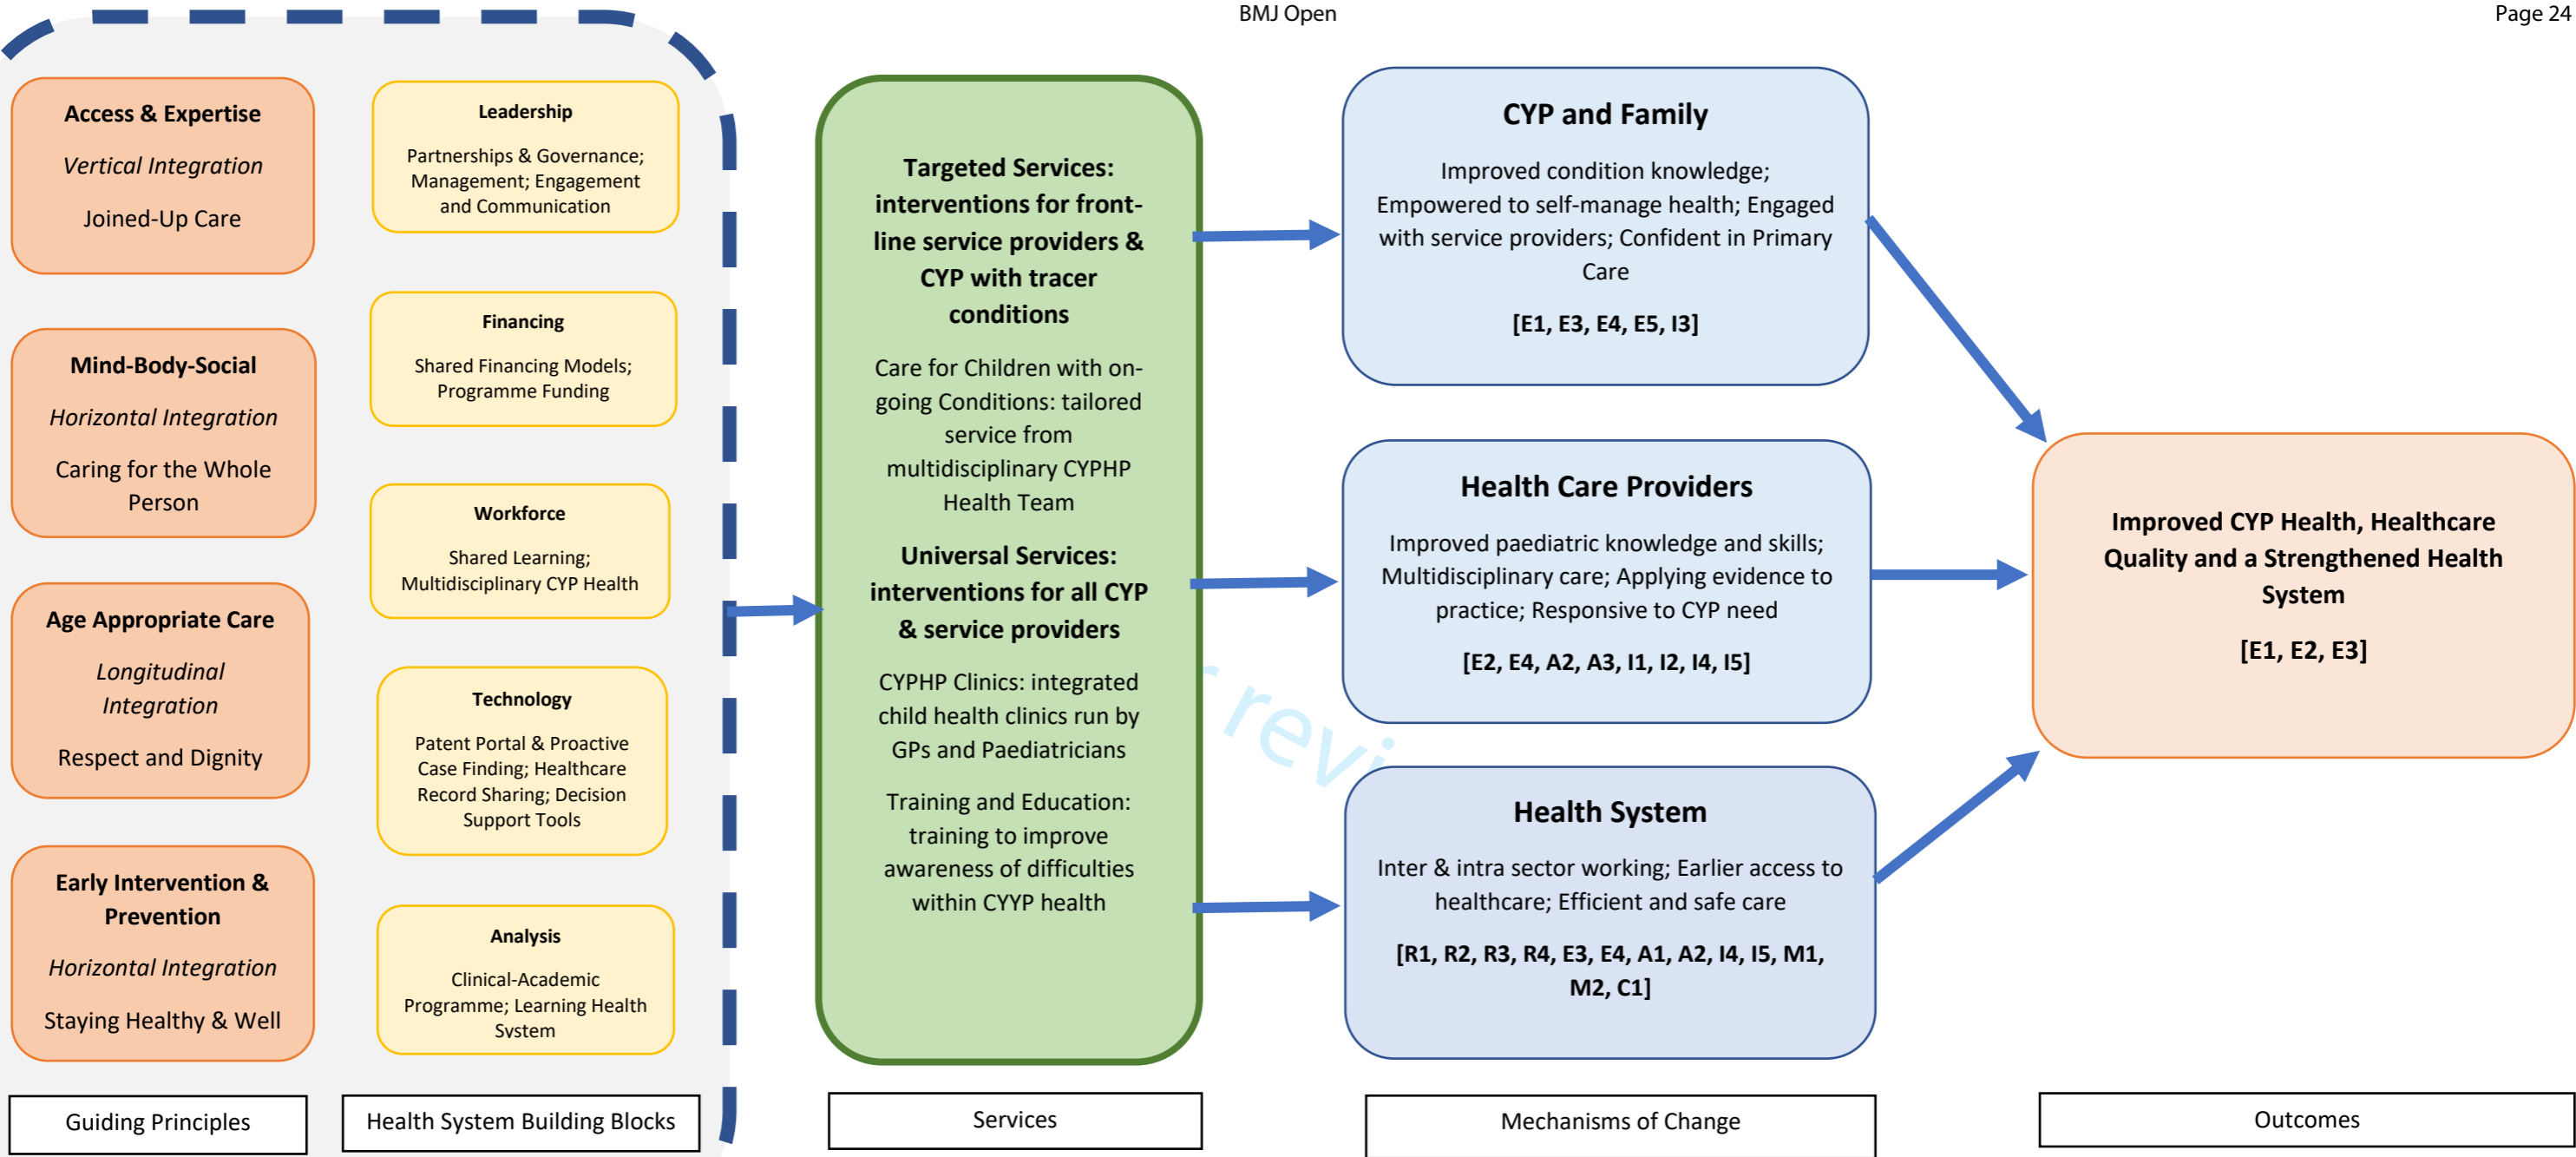

Figure 1. Theoretical Framework for the CYPHP Evelina London Model of Care; [x] represents process indicators which are detailed in Table 1. The CYPHP Evelina London Model of Care provides numerous universal and targeted services; the interventions described here are provided as an example and are not exhaustive.
